# Supplementary material
Source: PubMed Central journal article supplement (PMC8341929)
Supplement: CB-002-D1CB00033K-s001.pdf [file CB-002-D1CB00033K-s001.pdf]

## Electronic Supplementary Information

# A bicyclic S-adenosylmethionine regeneration system applicable with different nucleosides or nucleotides as cofactor building blocks

*Désirée Popadić,<sup>a</sup> Dipali Mhaindarkar,<sup>a</sup> Mike H. N. Dang Thai,<sup>a</sup> Helen C. Hailes,<sup>b</sup> Silja Mordhorst,<sup>a,c</sup> and Jennifer N. Andexer<sup>\*a</sup>*

<sup>a</sup> Institute of Pharmaceutical Sciences, University of Freiburg, Albertstr. 25, 79104 Freiburg, Germany

<sup>b</sup> Department of Chemistry, University College London, 20 Gordon Street, London, WC1H 0AJ, United Kingdom

<sup>c</sup> Present address: Institute of Microbiology, ETH Zürich, Vladimir-Prelog-Weg 1–5/10, 8093 Zurich, Switzerland

**\*Corresponding E-mail:** [jennifer.andexer@pharmazie.uni-freiburg.de](mailto:jennifer.andexer@pharmazie.uni-freiburg.de)

## Table of Contents

|                                                                                             |     |
|---------------------------------------------------------------------------------------------|-----|
| Experimental .....                                                                          | S2  |
| Materials .....                                                                             | S2  |
| Enzymes used in the regeneration systems (cloning, expression, and purification) .....      | S2  |
| HPLC analysis .....                                                                         | S3  |
| Buffer screening for SAM regeneration system .....                                          | S3  |
| Assays for cyclic cofactor regeneration system .....                                        | S3  |
| Assays for extended three-enzyme cascade starting from L-homocysteine .....                 | S4  |
| Control assays for side reactions .....                                                     | S5  |
| Statistical analysis .....                                                                  | S5  |
| DNA sequences .....                                                                         | S5  |
| Protein sequences .....                                                                     | S9  |
| State of the art .....                                                                      | S11 |
| Results and discussion .....                                                                | S16 |
| Starting point for optimisation .....                                                       | S16 |
| Quantitative data for MT conversion and TTNs .....                                          | S17 |
| Buffer screening .....                                                                      | S21 |
| Co-purified MTAN is not the only reason for adenine accumulation .....                      | S23 |
| Options for the removal of L-homocysteine .....                                             | S24 |
| N-Methylation also improved by optimised system with L-methionine regeneration .....        | S32 |
| Cyclic SAM regeneration with L-methionine regeneration is more efficient than without ..... | S33 |
| Regeneration of SAM analogues is possible with nucleobase modifications .....               | S34 |
| The regeneration system can be used with crude lysates .....                                | S35 |
| References .....                                                                            | S36 |

## Experimental

### Materials

Substrates and reference standards were purchased in the highest purity available from Sigma-Aldrich (ATP, ADP, AMP, adenosine, IDP, IMP, inosine, hypoxanthine, CTP, CDP, CMP, cytidine, cytosine, SAM, SAH, MTA, L-methionine, L-ethionine, D/L-SMM, *N*-ethylanthranilic acid, and 3,4-dihydroxybenzoic acid), Acros Organics (isovanillic acid and sodium polyphosphate), Alfa Aesar (*N*-methylantranilic acid, vanillic acid), AppliChem (adenine), Th. Geyer (ITP) and Fluka (anthranilic acid). Ingredients for buffers and cultivation media were purchased from Carl Roth.

### Enzymes used in the regeneration systems (cloning, expression, and purification)

The cloning, expression, and purification of the majority of enzymes used in the regeneration system have been described in previous publications.<sup>1-3</sup> Only modifications and newly added enzymes are described here. An overview of all enzymes and their UniProt accession numbers are listed in Table S3, as well as their DNA and protein sequences below.

The 975 bp gene coding for the L-homocysteine *S*-methyltransferase from *Saccharomyces cerevisiae* (ScHSMT) was amplified by PCR from genomic DNA of baker's yeast (primers used: ScHSMT-NdeI-fwd 5' -TATATACATATGAAGCGCATTCCAATCAAAG-3' and ScHSMT-HindIII-rv 5' -TATATAAGCTTAGGAGTATTTATCTACAGCTGATGC-3') and cloned into pET28a(+) using T4 DNA ligase (New England Biolabs GmbH, Frankfurt am Main, Germany). The 1224 bp gene coding for the betaine-L-homocysteine *S*-methyltransferase from *Rattus norvegicus* (RnBHMT) was purchased as synthetic DNA strings from Invitrogen (Thermo Fisher Scientific, Waltham, MA, USA), amplified by PCR (primers used: RnBHMT-NdeI-fwd 5' -CGCGCGGCAGCCATATGGCACCGATTGCAGGT-3' and RnBHMT-HindIII-rv 5' -GTGCGGCCGCAAGCTTAAGCTTACTGTGCGCTCTTAAATTT-3') and cloned into pET28a(+) using In-Fusion Cloning (Takara Bio Europe, Saint-Germain-en-Laye, France). Restriction sites were included in the primers to leave the option for using restriction enzyme cloning.

The enzymes used in the regular SAM regeneration system were produced in *E. coli* BL21-Gold(DE3) (Agilent, Santa Clara, CA, USA). To eliminate any nucleosidase contamination, *E. coli*  $\Delta$ *mtn* (DE3) cells were used, which were kindly provided by C. Liao and F. Seebeck (University of Basel, Switzerland).<sup>4</sup>

The expression of *TkMAT* (*Thermococcus kodakarensis* methionine adenosyltransferase) was improved by the addition of the RIPL plasmid (Agilent, Santa Clara, CA, USA) to the *E. coli* strains, as well as using 2xYT medium for expression. RnBHMT was also expressed in 2xYT medium. As the expression of *MmSAHH* (*Mus musculus* SAH hydrolase) was decreased in the nucleosidase-deficient strain, 2xYT medium was used for expression.

Seed cultures (5 mL) were grown in LB medium with the corresponding antibiotics at 37 °C overnight. The main culture (400 mL plus added seed culture) was grown in LB medium, if not otherwise stated, supplemented with the needed antibiotics, at 37 °C. When the OD<sub>600</sub> was higher than 0.5, the expression was induced by the addition of isopropyl- $\beta$ -D-thiogalactopyranoside (IPTG; final concentration 0.25 mM, for RnBHMT 0.20 mM) and the cultures were shaken at 160 rpm for at least 18 h at 20 °C. The cells were harvested by centrifugation and lysed by sonication [Branson Sonifier 250, Emerson, St. Louis, MO, USA (duty cycle 50%,

intensity 50%, 5 x 30 s with 30 s breaks)] in lysis buffer [40 mM Tris-HCl, pH 8.0, 100 mM NaCl, 10% (w/v) glycerol].

After centrifugation the crude lysate was either directly used for assays or the soluble proteins were purified by nickel-NTA affinity chromatography (Invitrogen, Thermo Fisher Scientific, Waltham, MA, USA) and desalted using a PD-10 column (GE Healthcare Life Sciences, Little Chalfont, UK). The storage buffer of the enzymes was the same as the lysis buffer. Protein concentration was determined using the absorbance at 280 nm, the molecular weight (including the His<sub>6</sub>-tag), and the protein extinction coefficient (calculated with ExPASy ProtParam tool<sup>5</sup>) with a NanoDrop 2000 (Thermo Fisher Scientific, Waltham, MA, USA). Purified protein samples were visualised by SDS-PAGE (Fig. S2).<sup>6</sup>

## HPLC analysis

All substrates, products, and intermediates in the regeneration system that are commercially available have been used as authentic reference standards and for calibration curves.

All assays were analysed with an Agilent 1100 Series HPLC using an ISAspher SCX 100-5 column (250 mm x 4.6 mm, 5 µm, ISERA GmbH, Düren, Germany). The HPLC method for the substrates and products has been described previously.<sup>2</sup> The injection volume was set to 5 µL for assays with **12** and to 10 µL for assays with **18**. All retention times and calibration curves are listed in Table S4.

## Buffer screening for SAM regeneration system

The standard conditions for the assays were 50 mM buffer, 20 mM MgCl<sub>2</sub>, 50 mM KCl, and 20 mM polyP (calculated as single phosphate residues). The MT substrate **12** was used at 2 mM and the cofactor building block AMP was supplied at 40 µM, while L-methionine was added in excess at 3 mM. The concentrations of the enzymes were 1 µM for *ScADK*, *AjPPK2*, and *SmPPK2* and 10 µM for *EcMAT*, *RnCOMT*, and *MmSAHH*. Different buffer systems with various pHs (potassium phosphate pH 7.5, 8.0; HEPES-NaOH pH 7.5, 8.0; Tris-HCl, pH 7.0, 7.5, 8.0, 8.5, 9.0) were tested for overall activity of the regeneration system looking at the *RnCOMT* conversion of 3,4-dihydroxybenzoic acid (**12**) to its methylated products vanillic acid (**13**) and isovanillic acid (**14**). A master mix of all necessary enzymes was prepared and added to the assay to start the reaction. Negative controls were prepared without any addition of enzymes. The samples were incubated at 37 °C at 300 rpm in a final volume of 200 µL and the reaction stopped by the addition of 10% (v/v) perchloric acid [final concentration 2.5% (v/v)] after 20 h. The samples were immediately frozen in liquid nitrogen and stored at -20 °C. Prior to HPLC analysis, the samples were re-thawed, centrifuged for 30 min at 18213 × g at 4 °C, and 80 µL of the supernatant was transferred to an HPLC vial with inlet.

## Assays for cyclic cofactor regeneration system

### SAM regeneration

The standard conditions for the assays were 50 mM Tris-HCl, pH 8.0, 20 mM MgCl<sub>2</sub>, 50 mM KCl, and 20 mM polyP (calculated as single phosphate residues). The substrate of the MTs, **12** or **18**, was used at 2 mM and the cofactor building block AMP was varied between 0 and 40 µM, resulting between 50 and 200 maximum turnover numbers possible in the reaction set-up. L-Methionine was added in excess at 3 mM. The concentrations of the enzymes were 1 µM for *ScADK*, *AjPPK2*, and *SmPPK2* and 10 µM for *EcMAT*, *RnCOMT* or *RgANMT*, and *MmSAHH*. The samples were incubated, stopped, and prepared for HPLC analysis as described above.

#### SAM and L-methionine regeneration with 5 mM MT substrate

Enzyme concentrations and set-ups were the same as for all other assays. 5 mM MT substrate **12** were used with either an excess of 7.5 mM L-methionine or 7.5 mM S-methyl-D/L-methionine (D/L-SMM) and 40  $\mu$ M L-methionine. AMP was varied between 10 and 100  $\mu$ M. The samples were incubated and stopped described above. After centrifugation, the samples were diluted 1:1 with water and 80  $\mu$ L of the dilution was transferred to a HPLC vial with inlet.

#### SAE regeneration

The same assay set-up was used as described for the SAM regeneration only the alkyl group donor was swapped to L-ethionine and *TkMAT* was used. Anthranilic acid (**18**) was used as substrate with *RgANMT* as MT. The samples were incubated, stopped, and prepared for HPLC analysis as described above.

#### S<sup>7dz</sup>AM regeneration

The same assay set-up was used as described for the SAM regeneration only the cofactor building block was exchanged. 7-Deazadenosine (**7b**, tubercidin) was used as starting material, as a nucleoside monophosphate was not available, AMP (1  $\mu$ M) was added to start the reaction. Both *EcMAT* and *TkMAT* were tested with the modified cofactor building block. The samples were incubated, stopped, and prepared for HPLC analysis as described above.

#### SAM and L-methionine regeneration

The same assay set-up was used as described for the SAM regeneration, except that L-methionine was reduced to 40  $\mu$ M or not added at all. Either D/L-SMM or betaine were added at 3 mM in excess and an additional enzyme for L-methionine regeneration, *SchSMT* or *RnBHMT*, was added at 10  $\mu$ M. The samples were incubated, stopped, and prepared for HPLC analysis as described above.

#### SIM and SCM regeneration

The same assay set-up was used as described for the SAM regeneration only the cofactor building block was exchanged. Either IMP or CMP was added at 40  $\mu$ M. As *EcMAT* did not accept ITP and CTP as substrates, *TkMAT* was used in all assays containing cofactor analogues. Assays featuring L-methionine regeneration included 40  $\mu$ M L-methionine, 3 mM D/L-SMM and 10  $\mu$ M *SchSMT*. The samples were incubated, stopped, and prepared for HPLC analysis as described above.

#### SAM regeneration with crude lysates

The assays were set up in the same way as the ones featuring purified enzymes. The final concentration of crude lysates was 10% (v/v) for *EcMAT*, *RnCOMT*, *MmSAHH*, and *SchSMT*, and 1% (v/v) for *ScADK*, *AjPPK2*, and *SmPPK2*. Negative controls were set up with crude lysate of empty pET28a(+) vector [final concentration 33% (v/v)] cultivated in the same way as the other cultures. The samples were incubated, stopped, and prepared for HPLC analysis as described above.

#### **Assays for extended three-enzyme cascade starting from L-homocysteine**

The standard conditions for the assays were 50 mM Tris-HCl, pH 8.0, 20 mM MgCl<sub>2</sub>, and 50 mM KCl. The starting material was 2 mM L-homocysteine, 2.5 mM betaine or D/L-SMM, 2.5 mM ATP, and 2 mM MT substrate **12** and the enzymes added were *RnBHMT* or *SchSMT*, *EcMAT*, *RnCOMT*, and *EcMTAN* at 10  $\mu$ M each. The samples were incubated for 20 h, stopped, and prepared for HPLC analysis as described above.

## Control assays for side reactions

### SAH as methyl acceptor

To check if SAH can directly be methylated by ScHSMT (or RnBHMT), 10 µM of the enzyme was incubated with 1 mM SAH and 2 mM D/L-SMM (or 2 mM betaine), in the optimised buffer system. The samples were incubated for 5.5 h, stopped, and prepared for HPLC analysis as described above.

### 12 as methyl acceptor

To check if **12** can directly be methylated by ScHSMT (or RnBHMT), 10 µM of the enzyme was incubated with 2 mM **12**, and 2 mM D/L-SMM (or 2 mM betaine) in the optimised buffer system. The samples were incubated for 20 h, stopped, and prepared for HPLC analysis as described above.

### Methionine alternatives as substrate for EcMAT

To check if EcMAT accepts either D/L-SMM (or betaine as an L-methionine alternative, the reaction was coupled to RnCOMT with **12** as substrate for easier detection. 10 µM of each enzyme were added to 3 mM ATP and either 3 mM L-methionine (positive control), 3 mM D/L-SMM or 3 mM betaine with 2 mM **12** as MT substrate, in the optimised buffer system. The samples were incubated for 20 h, stopped, and prepared for HPLC analysis as described above.

### Methyl donors directly used by RnCOMT

It was checked if RnCOMT accepts either D/L-SMM or betaine directly as a methyl donor. 10 µM of the enzyme was added to either 3 mM SAM (positive control), 3 mM D/L-SMM or 3 mM betaine with 2 mM **12** as MT substrate, in the optimised buffer system. The samples were incubated for 20 h, stopped, and prepared for HPLC analysis as described above.

## Statistical analysis

As MT conversion was detected without the addition of cofactor building block, a statistical analysis was conducted to check if the conversion with modified cofactor building blocks was significant. An unpaired t-test was used.

## DNA sequences

### >AjPPK2 (codon-optimised for *E. coli*)

```
ATGGACACCGAAACCATTTGCAAGCGCAGTTCTGAATGAAGAACAGCTGAGCCTGGATCTGATTGAAGCACAGTAT
GCACTGATGAATACCCGTGATCAGAGCAATGCAAAAAGCCTGGTTATTCTGGTTAGCGGTATTGAACTGGCAGGT
AAAGGTGAAGCAGTTAAACAGCTGCGTGAATGGGTTGATCCGCGTTTTCTGTATGTTAAAGCAGATCCGCCTCAC
CTGTTTAATCTGAAACAGCCGTTTTGGCAGCCGTATAACCCGTTTTGTTCCCTGCCGAAGGTCAGATTATGGTTTG
TTGGTAATTGGTATGGTATCTGCTGGCAACCGCAATGCATGCAAGCAAACCGCTGGATGATACCCTGTTTGAT
GAATATGTTAGCAACATGCGTGCCTTTGAACAGGATCTGAAAAATAACAATGTGGATGTGCTGAAAAGTGTGGTTT
GATCTGAGCTGGAAAAGCCTGCAGAAAACGTCTGGATGACATGGATCCGAGCGAAGTTCATTGGCATAAACTGCAT
GGTCTGGATTGGCGTAACAAAAACAGTATGATACGCTGCAAAAACCTGCGTACCCGCTTTACCGATGATTGGCAG
ATTATTGATGGTGAAGATGAAGATCTGCGCAACCATAATTTTGCACAGGCAATTCTGACCGCACTGCGTCATTGT
CCGGAACATGAAAAAAGCAGCACTGAAATGGCAGCAGGCACCGATTCCGGATATTCTGACCCAGTTTGAAGTT
CCGCAGGCAGAAGATGCAAACTATAAAAGCGAACTGAAAAAACTGACCAAACAGGTTGCAGATGCAATGCGTTGT
GATGATCGTAAAGTTGTGATTGCGTTTTGAAGGTATGGATGCAGCCGGTAAAGGCGGTGCAATTAACGTATTGTT
AAAAAACTGGATCCGCGTGAGTATGAGATTTCATACCATTGCAGCACCGGAAAAAATATGAACTGCGTTCGTTCTG
CTGTGGCGTTTTTTGGAGCAAACCTGCAGAGTGATGATATCACCATTTTTGATCGTACCTGGTATGGTTCGTGTTCTG
GTTGAACGTGTTGAAGTTTTTGCAACCGAAGTTGAATGGCAGCGTGCCTATGCAGAAAATTAATCGCTTTGAAAAA
AATCTGAGCAGCAGCCAGACCGTGCTGATCAAATTTTTGGCTGGCAATTGATAAAGATGAACAGGCAGCACGTTTTT
AAAGCACGTGAAAGCACACCGCATAAACGCTTTAAAATCACCGAAGAGGATTGGCGCAATCGTGATAAATGGGAT
```

GATTATCTGAAAGCCGCGAGCAGATATGTTTTGCACATACCGATAACCAGCTATGCACCGTGGTATATTATCAGCACC  
AATGATAAACAGCAAGCCCGTATTGAAGTTCTGCGTGCAATCCTGAAACAACCTGAAAGCGGATCGTGATACCGAT  
TAA

>*EcMAT*

ATGGCAAACACCTTTTTTACGTCCGAGTCCGTCTCTGAAGGGCATCCTGACAAAATTGCTGACCAAATCTCTGAT  
GCCGTTTTAGACGCGATCCTCGAACAGGATCCGAAAGCACGCGTTGCTTGCGAAACCTACGTAAAAACCGGCATG  
GTTTTAGTTGGCGGCGAAATCACCACCAGCGCCTGGGTAGACATCGAAGAGATCACCCGTAACACCGTTTCGCGAA  
ATTGGCTATGTGCATTCCGACATGGGCTTTGACGCTAACTCCTGTGCAGTTCTGAGCGCTATCGGCAAACAGTCT  
CCTGACATCAACCAGGGCGTTGACCGTGCCGATCCGCTGGAACAGGGCGCGGGTGACCAGGGTCTGATGTTTTGGC  
TACGCAACTAATGAAACCGACGTGCTGATGCCAGCACCTATCACCTATGCACACCGTCTGGTACAGCGTCAGGCT  
GAAGTGCCTAAAAACGGCACTCTGCCGTGGCTGCGCCCGGACGCGAAAAGCCAGGTGACTTTCAGTATGACGAC  
GGCAAATCGTTGGTATCGATGCTGCTGCTGCTTTCCACTCAGCACTCTGAAGAGATCGACCAGAAAATCGCTGCAA  
GAAGCGGTAATGGAAGAGATCATCAAGCCGATTCTGCCCGCTGAATGGCTGACTTCTGCCACCAAATCTTTCATC  
AACCCGACCGGTCGTTTTGTTATCGGTGGCCCGATGGGTGACTGCGGTCTGACTGGTTCGTAATAATATCGTTGAT  
ACCTACGGCGGCATGGCGCGTACGGTGGCGGTGCATTCTCTGGTAAAGATCCATCAAAAAGTGGACCGTTCCGCA  
GCCTACGCAGCACGTTATGTGCGGAAAAACATCGTTGCTGCTGGCCTGGCCGATCGTTGTGAAAATTCAGGTTCC  
TACGCAATCGGCGTGGCTGAACCGACTTCCATCATGGTAGAACTTTCCGTAAGTGCCTTCTGAACAA  
CTGACTCTGCTGGTACGTGAGTTCTTCGACCTGCGCCCATACGGTCTGATTTCAGATGCTGGATCTGCTGCACCCG  
ATCTACAAAGAAACCGCAGCATAACGGTCACTTTGGTTCGTGAACATTTCCCGTGGGAAAAAACCGACAAAGCGCAG  
CTGCTGCGCGATGCTGCCGGTCTGAAGTAA

>*EcMTAN*

ATGAAAATCGGCATCATTGGTGAATGGAAGAAGAAGTTACGCTGCTGCGTGACAAAATCGAAAACCGTCAAACCT  
ATCAGTCTCGGCGGTTGCGAAATCTATACCGGCCAACTGAATGGAACCGAGGTTGCGCTTCTGAAAATCGGGC  
GGTAAAGTCGCTGCGGCGCTGGGTGCCACTTTGCTGTTGGAACACTGCAAGCCAGATGTGATTATTAACACCGGT  
TCTGCCGGTGGCCTGGCACCAACGTTGAAAAGTGGGCGATATCGTTGTCTCGGACGAAGCACGTTATCACGACCG  
GATGTCACGGCATTGTTGTTATGAATACGGTTCAGTTACCAGGCTGTCCGGCAGGCTTTAAAGCTGACGATAAACTG  
ATCGCTGCCGCTGAGGCCTGCATTGCCGAACTGAATCTTAAACGCTGTACGTGGCCTGATTGTTAGCGGCGACGCT  
TTCATCAACGGTTCTGTTGGTCTGGCGAAAATCCGCCACAACCTTCCACAGGCCATTGCTGTAGAGATGGAAGCG  
ACGGCAATCGCCCATGTCTGCCACAATTTCAACGTCCCGTTTTGTTGTCTACGCGCCATCTCCGACGTGGCCGAT  
CAACAGTCTCATCTTAGCTTCGATGAGTTCCCTGGCTGTTGCCGCTAAACAGTCCAGCCTGATGGTTGAGTCACTG  
GTGCAGAACTTGCACATGGCTAA

>*MmSAHH* (codon-optimised for *E. coli*)

ATGAGCGCAAACTGCCGTATAAAGTTGCAGATATTGGTCTGGCAGCATGGGGTTCGTAAAGCACTGGATATTGCA  
GAAAATGAAATGCCTGGTCTGATGCGTATGCGTGAAATGTATAGCGCAAGCAAACCGCTGAAAGGTGCACGTATT  
GCAGGTTGTCTGCACATGACCGTTGAAACCGCAGTTCTGATTGAAACCCCTGGTTGCACTGGGTGCAGAAGTTCGT  
TGGAGCAGCTGTAACATTTTTAGCACCCAGGATCATGCAGCAGCAGCAATTGCAAAAGCAGGTATTCGGTTTTT  
GCATGGAAGGTGAAACCGATGAAGAATATCTGTGGTGTATTGAACAGACCCTGCACCTTAAAGATGGTCCGCTG  
AATATGATTCTGGATGATGGTGGTGTCTGACCAATCTGATTTCATAACCAATATCCGCAGCTGCTGAGCGGTATT  
CGTGGTATTAGCGAAGAAACCACCACCGGTGTTTCATAACCTGTATAAAATGATGAGCAACGGCATTCTGAAAGTT  
CCGGCAATTAATGTTAATGATAGCGTGACCAAAAAGCAAATTCGATAATCTGTATGGTTGTCGCGAAAAGCCTGATT  
GATGGTATTAACGTGCAACCGATGTTATGATTGCAGGTAAAGTTGCCGTTGTTGCAGGTTATGGTGTGTTGGT  
AAAGGTTGTGCACAGGCACTGCGTGGTTTTGGTGCACGTGTGATTATTACCGAAATTGATCCGATTAATGCACTG  
CAGGCAGCAATGGAAGGCTATGAAGTTACCACCATGGATGAAGCATGTAAAGAAGGCAACATTTTTGTTACAACC  
ACCGGTTGCGTTGATATCATTCTGGGTGCTCATTCTGAGCAGATGAAAGATGATGCCATTGTGTGCAATATCGGC  
CATTTTTGATGTTGAGATTGATGTGAAATGGCTGAATGAAAACCGCTGGAAAAAGTGAACATTAACCGCAGGTT  
GATCGCTATTGGCTGAAAAATGGTTCGTCGATATTATTCTGCTGGCAGAAGGTGCTCTGGTTAATCTGGGTTGTGCA  
ATGGGTTCATCCGAGCTTTGTTATGAGCAATAGCTTTACCAATCAGGTGATGGCACAGATTGAACTGTGGACCCAT  
CCGGATAAATATCCGGTTGGTGTTCATTTCCCTGCCGAAAAAACTGGATGAGGCAGTTGCAGAAGCACATCTGGGT  
AAACTGAATGTGAAACTGACCAAACTGACAGAAAAACAGGCACAGTATCTGGGTATGCCGATTAACGGTCCGTTT  
AAACCGGATCATTATCGCTATTAA

>*RgANMT* (codon-optimised for *E. coli*)

ATGGGTAGCCTGAGCGAAAGCCATACCCAGTATAAACATGGTGTGAAAGTGAAGAAGATGAAGAGGAATCATAT  
AGCCGTGCAATGCAGCTGAGCATGGCAATTGTTCTGCCGATGGCAACCCAGAGCGCAATTCAGCTGGGTGTTTTT  
GAAATTATTGCAAAGCACCAGGTTGGTTCGTCTGAGCGCAAGCGAAATTGCAACCATTCTGCAGGCACAGAATCCG  
AAAGCTCCGGTTATGCTGGATCGTATGCTGCGTCTGCTGGTTAGCCATCGTGTCTGGATTGTAGCGTTAGCGGT  
CCGGCAGGCGAACGTCTGTATGGTCTGACCAGCGTTAGCAAATATTTTCGTTCCGGATCAGGATGGTGAAGCCTG  
GGCAATTTTATGGCACTGCCGCTGGATAAAGTTTTTATGGAAAGCTGGATGGGTGTTAAAGGTGCAGTTATGGAA  
GGTGGTATTCCGTTTAAATCGTGTTCATGGCATGCACATCTTTGAATATGCAAGCAGCAATAGCAAATTCAGCGAT  
ACCTATCATCGTGCCATGTTTAAATCATAGCACCATTGCACTGAAACGCATCCTGGAACACTATAAAGGTTTTGAG  
AATGTGACCAAACCTGGTTGATGTTGGTGGTGGTCTGGGTGTTACCCTGAGCATGATTGCAAGCAAATATCCGCAT  
ATTCAGGCCATCAATTTTGTATCTGCCGCATGTTGTTTCCAGGATGCAGCAAGCTATCCGGGTGTTGAACATGTGGGT  
GGTAATATGTTTGAAGCGTTCCGGAAGGTGATGCCATTCTGATGAAATGGATTCTGCATTGTTGGGATGATGAA  
CAGTGTCTGCGTATTCTGAAAACTGCTATAAAGCCACACCCGAAAAATGGCAAAGTGATTGTTATGAATAGCGTT  
GTTCCGAAACACCCGGAAGTTAGCAGCAGCGCACGTGAAACCAGCCTGCTGGATGTTCTGCTGATGACCCGTGAT  
GGTGGTGGCCGTGAACGTACCCAGAAAGAATTTACCGAACTGGCAATTTGGTGCAGGTTTTAAAGGTATTAACTTT  
GCCTGTTGCGTGTGCAACCTGCATATTATGGAATTTTTCAATAA

>*RnBHMT* (codon-optimised for *E. coli*)

ATGGCACCGATTGCAGGTAAAAAGCAAAACGTGGTATTCTGGAACGTCTGAATGCCGGTGAAGTTGTTATTGGT  
GATGGTGGTTTTGTTTTTCGCACTGGAAAAACGCGGTTATGTTAAAGCAGGTCCGTGGACACCCGGAAGCAGCAGTT  
GAACATCCGGAAGCCGTTTCGTGAGCTGCATCGTGAATTTCTGCGTGCAGGTAGCAATGTTATGCAGACCTTTACC  
TTTTATGCCAGCGAAGATAAACTGGAAAACTCGTGGTAATTATGTGGCCGAAAAAATCAGCGGTGCAAAAAGTTAAT  
GAAGCAGCATGTGATATTGCACGTCAGGTTGCAGATGAAGGTGATGCACTGGTTGCCGGTGGTGTAGTCAGACC  
CCGAGCTATCTGAGCTGTAAAAGCGAAACCGAAGTGAAGAAAAATCTTTCATCAGCAGCTGGAAGTGTATTGAAA  
AAGAACGTGGATTTTCTGATCGCCGAATATTTTGAACATGTGGAAGAAGCAGTTTGGGCAGTTGAAGCACTGAAA  
ACCAGCGGTAAACCGATTGCCGCAACCATGTGTATTGGTCCGGAAGGTGATCTGCATGGTGTTCACCCGGGTGAA  
TGTGCAGTTTCGTCTGGTTAAAGCCGGTGCAGCAATTTGTTGGTGTAAATTTGTCATTTTTCATCCGAGCACCAGCCTG  
CAGACCATTAAACTTATGAAAGAAGGTCTGGAAGCAGCCCGTCTGAAAGCATATCTGATGAGCCATGCACTGGCA  
TATCATAACCCGGATTGTGGTAAACAGGGTTTTTATTGATCTGCCGGAATTTCCGTTTGGTCTGGAACCCGCGTGT  
GCAACCCGTTGGGATATTTCAGAAATATGCACGTGAAGCATATAATCTGGGTGTGCGTTATATTGGTGGTTGTTGT  
GGTTTTGAACCGTATCATATTCGTGCCATTGCAGAAGAAGTGGCACCCGGAACCGGTTTTCTGCCTCCGGCAAGC  
GAAAAACATGGTAGCTGGGGTAGCGGTCTGGATATGCATACAAAACCGTGGATTTCGTGCACGTGCCCGTAAAGAA  
TATTGGCAGAATCTGCGTATTGCAAGCGGTTCGTCCGTATAATCCGAGCATGAGCAAACCGGATGCATGGGGTGT  
ACCAAAGGTGCAGCAGAAGTATGCAGCAAAAAGAAGCAACCACCGAACAGCAGCTGCGTGCATGTTTGAAGAA  
CAGAAATTTAAGAGCGCACAGTAA

>*RnCOMT* (codon-optimised for *E. coli*)

ATGGGTGACACAAAGGAGCAGCGCATCCTGCGCTACGTGCAGCAGAATGCAAAGCCTGGAGACCCCTCAGAGCGTC  
CTGGAGGCCATCGACACCTACTGCACACAGAAGGAATGGGCCATGAATGTGGGTGACGCGAAAGGCCAAATCATG  
GATGCAGTGATTTCGGGAGTACAGCCCCCTCCCTGGTGTGCTGGAAGTGGGAGCTTACTGTGGCTACTCAGCAGTGC  
ATGGCTCGCCTGCTGCAGCCTGGAGCCAGGCTTCTCACCATGGAGATGAACCCTGACTACGCTGCCATCACCCAG  
CAAATGCTGAACTTTGCAGGCCCTACAGGACAAAGTCAACATCCTCAATGGGGCATCCCAGGATCTTATCCCCAG  
CTGAAGAAGAAGTACGACGTGGACACACTAGACATGGTCTTTCTTGACCACTGGAAAGACCGCTACCTTCCAGAC  
ACACTTCTCCTGGAGAAATGTGGCCTGCTGCGCAAGGGGACAGTGTCTTAGCTGACAACGTATCGTCCCGGGA  
ACCCCTGACTTCTTGGCGTATGTGAGAGGGAGCAGCAGCTTCGAGTGCACACACTACAGCTCATACCTGGAGTAC  
ATGAAAGTTGTAGACGGCTTGGAGAAGGCAATCTACCAGGGTCCAAGTAGCCCTGACAAGTCTTGA

>*ScADK*

ATGACCGCACCATTTGGTAGTATTGGGTAACCCACTTTTAGATTTCCAAGCCGACGTCACGGCTGAATACCTGGCC  
AAGTATTCTCTAAAGGAAAACGACGCAATTTTGGTGCATGCCAAATCAGGCGATGCTAAGATGGCTATTTTTGAC  
GAGCTCTTACAGATGCCAGAAACAAAGCTTGTGTCAGGTGGTGTCTGCTCAAAACACTGCTAGAGGGGCAGCATA  
GTTTTGGGCGCCGGCCAGGTGGTGTACTTCCGTTCCGTCGGTAAGGACAAGTTCAGCGAGAGATTGCTTAAACGAA  
AACGAAAAAGCTGGTGTCAAGTCTATGTACCAAGTTCAAAATGATATTGGTACCGGTAAGTGTGCCGCATTAATC  
ACTGGCCATAACCGGTCCTTGGTCACTGACTTGGGTGCTGCCAATTTCTTACTCCAGACCACTTGGACAAGCAT  
TGGGACTTGGTGAAGCAGCTAAGCTCTTCTACATCGGTGGTTTTCCACTTGACCGTGTCTCCAGACGCTATCGTT  
AAGTTGGGCCAACATGCTAAAGAGAACAGCAAACCTTTTCGTGTTGAACTTTAGTGTCTCTTTCATTCCTCATGTC  
TTCAAAGACGCATTGGCCAGAGTTTTGCCTTATGCTACCGTCATCATCGCTAACGAATCGGAGGCCGAAAGCCTTT  
TGCGACGCCTTCCAATTAGACTGTGCCAACACTGATTTGGAAGCTATTGCTCAAAGAATTTGTCAAGGACTCTCCA

GTTGAAAAGACTGTCATCTTCACCCACGGTGTGCGAACCAACAGTGGTTCGTGTCTCCCAAGGGTACCAGCACATAT  
CCAGTCAAACCTTTGGACTCTTCTAAGATCGTTCGACACCAACGGTGGTGGTACGCCTTCGCTGGTGGCTTTATG  
GCTGGGTTGACTAAAGGTGAAGATTTGGAAACCTCTATTGACATGGGTCAATGGCTAGCTGCTTTGTCTATTCAA  
GAAGTTGGTCCCTCTTACCCTTCCGAAAAAATATCTTACTCTAAA

### >ScHSMT

ATGAAGCGCATTCCAATCAAAGAATAATAGTTGAGCACCCCCGAAAAGTTCTTATCCTTGATGGTGGACAGGGT  
ACAGAATTGGAAAACAGAGGCATTAACATAAATAGTCCGGTATGGTCTGCAGCTCCTTTTACGAGCGAATCCTTT  
TGGGAGCCATCTTCTCAAGAGCGAAAGGTGGTAGAAGAAATGTACAGAGACTTTATGATTGCTGGCGCAAACATA  
TTAATGACAATTACTTACCAGGCAAACCTTTCAAAGCATATCTGAGAATACCTCGATTAAAACCTCGGCTGCTTAC  
AAGCGTTTTCTCGATAAAAATCGTGTCAATTTACTCGTGAATTTATTGGTGAGGAAAGGTACTTAATCGGGAGTATT  
GGCCCATGGGCAGCACATGTATCCTGTGAATATACTGGTACTATGGTCCCATCCTGAGAATATTGATTACTAC  
GGCTTTTTCAAACCCAGCTGGAGAACCTTCAACCAAAATAGAGATATTGATCTTATTGGTTTTGAAACGATTCCA  
AATTTTCATGAGTTAAAGGCTATTTTATCCTGGGATGAAGATATTATTTTGAAGCCCTTTTATATTGGGTTGTGC  
GTGGATGACAATAGTTTGTACGAGACGGTACCCTTTGGAAGAAATTTCTGTCCATATAAAAAGGCCTCGGAAAT  
AAAATTAACAAGAATCTCTTATTAATGGGAGTTAACTGTGTGAGTTTCAATCAATCGGCATTAATTTCTAAAAATG  
TTGCACGAGCATCTACCTGGCATGCCTCTGCTAGTTTACCCAAACAGTGGAGAAATCTACAATCCCAAAGAGAAAG  
ACATGGCACCGGCCGACTAATAAGTTGGATGACTGGGAGACCACGGTTAAGAAATTCGTTGATAATGGTGCAGCGC  
ATTATTGGCGGTTGTTGTAGAACGTCTCCTAAAGATATCGCCGAAATTCATCAGCTGTAGATAAAATACTCCTAA

### >SmPPK2 (codon-optimised for *E. coli*)

ATGGCCCTGGATGAAGCACCGGCAGAAAGCACGTCCGGGTAGCCGTGCAGTTGAACTGGAAATGATGGTTCGTAGC  
CGCATTTTTGATATTGATGATCCTGATCTGCCGAAATGGATTGATGAAGAGGCATTTTCGTAGTGATGATTATCCG  
TATAAAAAAAACTGGATCGCGAAGAGTATGAGGAAACCTGACCAAACCTGCAGATCGAACTGGTTAAAGTTTCAG  
TTTTGGATGCAGGCAACCGGTAAACGTGTTATGGCAGTTTTTTGAAGGTCGTGATGCAGCAGGTAAAGGTGGTGCA  
ATTCATGCAACCACCGCAAATATGAATCCGCGTAGCGCACGTGTTGTTGCACTGACAAAACCGACCGAAACCGAA  
CGTGGTCAGTGGTATTTTTAGCGTTATGTTGCAACCTTTCCGACCGCAGGCGAATTTGTTCTGTTTGTATCGTAGC  
TGGTATAATCGTGCCGGTGTGTAACCGGTTATGGGTTTTTGTACACCGGATCAGTATGAACAGTTTCTGAAAAGAA  
GCACCGCGTTTTGAAGAAATGATTGCCAATGAAGGTATCCACCTGTTCAAATTTCTGGATTAACATTGGTTCGTGAG  
ATGCAGCTGAAACGTTTTTCATGATCGTGCATGATCCTCTGAAAATTTGGAAACTGAGCCCGATGGATATTGCA  
GCACTGAGCAAATGGGATGATTATAACCGCAAACGTGATCGTATGCTGAAAAGAAACCCATAACCGAACATGGTCCCT  
TGGGCAGTTATTTCGTGGTAATGATAAACGTGCGAGCCGTATTAATGTTATTTCGTACATGCTGACTAAACTGGAT  
TATGACGGTAAAGATGAAGCAGCCATTGGTGAAGTGGATGAAAAAATTTCTGGGTAGCGGTCCGGGTTTTCTGCGT  
TAA

### >TkMAT

ATGGCTGGAAAGGTCAGGAACATAGTCGTTGAGGAGCTCGTCAGGACCCCAGTTGAGATGCAGAAGGTTGAGCTC  
GTTGAGAGGAAGGGTATCGGTACCCCGACAGCATAGCCGACGGTATAGCCGAGGCCGTCAGCAGGGCGCTCTCC  
AGGGAGTACGTGAAGAGGTACGGCATCATTCTCCACCACAACACCGACAGGTCGAGGTTGTCGGCGGAAGGGCC  
TACCCGAGTTTCGGCGGCGGTGAGGTCATCAAGCCGATCTACATCCTCCTCTCCGGAAGGGCCGTCGAGATGGTT  
GACAGGGAGTTCTTCCCCGTCCATGAGATAGCACTTAAGGCCGCAAAGGACTACCTCAGGAAGGCCGTCAGGCAC  
CTCGACCTCGAGCACACGTATCATAGACTCCCGCATCGGACAGGGAAGCGTTGACCTCGTTGGAGTCTTCAAC  
AAGGCTAAAAAGAACCCAATCCCGCTCGCCAACGACACCTCCTTTGGTGTGCGCTACGCCCCGCTCAGCGAGACC  
GAGAAGATCGTCCTTGAGACCGAGAAGTACCTCAACAGCGACGAGTTCAAGAAGAAGTACCCCGCCGTCGGTGAG  
GACATCAAGGTTATGGGTCTCAGGAAGGGAGACGAGATAGACCTCACCATCGCCGCTGCCATCGTTGACAGCGAG  
GTTGACAACCCCGACGATTACATGGCCGTGAAGGAGGCCATCTACGAGGCCGCAAGGGGATCGTCGAGTCCCAC  
ACAGAGAGGCCGACCAACATCTACGTGAACACCGCCGATGATCCGAAGGAGGGCATCTACTACATAACCGTCACA  
GGAAGTACGCGCCGAGGCCGGCGACGACGGTTCCGTGCGGAAGGGGCAACAGGGTTAACGGCCTCATCACCCCAAC  
AGGCACATGAGCATGGAGGCAGCGCGGGTAAGAACCCGGTGGAGCCACGTGCGTAAGATCTACAACATCCTCTCA  
ATGCTCATAGCGAACGACATAGCCGAGCAGGTCGAGGGCGTTGAGGAGGTTACGTTAGAATCTCAGCCAGATT  
GGAAAGCCGATAGACGAGCCTCTCGTTGCCAGCGTGCAGATAATCCCGAAGAAGGGCTACTCAATCGACGTCCTC  
CAGAAGCCGGCCTACGAGATAGCCGACGAGTGGCTGGCCAACATAACGAAGATACAGAAGATGATCCTCGAGGAC  
AAGGTAAACGTCTTCTGA



## Protein sequences

His<sub>6</sub>-tags are underlined.

### >AjPPK2

MGSSHHHHHHHSSGLVPRGSHMDTETIASAVLNEEQLSLDLIEAQYALMNRDQSNAKSLVILVSGIELAGKGEAV  
KQLREWVDPRFLYVKADPPHLFNLKQPFWQPYTRFVPAEQIMVWFGNWDLLATAMHASKPLDDTLFDEYVSN  
MRAFEQDLKNNNVDLKVWFDLSWKSLSQKRLDDMDPSEVHWHKHLHGLDWRNKKQYDTLQKLRTRFTDDWQIIDGE  
DEDLRNHNFAQAILTALRHCPHEHEKKAALKWQQAPIPDILTQFEVPPQAEDANYKSELKKLTKQVADAMRCDDRKV  
VIAFEGMDAAGKGGAIKRIVKKLDPREYEIHTIAAPEKYELRRPYLWRFWSKLSDDITIFDRTWYGRVFLVERVE  
GFATEVEWQRAYAEINRFEKNLSSSQTVLIKFWLAIDKDEQAARFKARESTPHKRFKITEEDWRNRDKWDDYLKA  
AADMFAHTDTSYAPWYIISTNDKQQARIEVLRAILKQLKADRDTD

### >EcMAT

MGSSHHHHHHHSSGLVPRGSHMAKHLFTSESVSEGHDPKIDQISDAVLDAILEQDPKARVACETYVKTGMVLVGG  
EITTSAWVDIEEITRNTVREIGYVHSDMGFDANSCAVLSAIGKQSPDINQGVDRADPLEQGAGDQGLMFGYATNE  
TDVLMPPAPITYAHLRVQRQAEVRKNGTLPWLRPDAKSQVTFQYDDGKIVGIDAVVLSTQHSEEIDQKSLQEAVME  
EIIKPIPAEWLTSATKFFINPTGRFVIGGPMGDCGLTGRKIVDITYGGMARHGGGAFSGKDPKVDRAAAYAAR  
YVAKNIVAAGLADRCEIQVSYAIGVAEPTSIMVETFGTEKVPSEQLTLLVREFFDLRPYGLIQMLDLLHPYKET  
AAYGHFGREHFPWEKTDKAQLLRDAAGLK

### >EcMTAN

MGSSHHHHHHHSSGLVPRGSHMKIGIIGAMEEEVTLLRDKIENRQTIISLGGCEIYTGQLNGTEVALLKSGIGKVAA  
ALGATLLEHCKPDVINTGSAGGLAPTLKVGDIVVSDAARYHDADVTAFGYEQQLPGCPAGFKADDKLIAAA  
ACIAELNLNAVRGLIVSGDAFINGSVGLAKIRHNFQAIQAVEMEATAIAHVCHNFNVFVVVRAISDVADQQSHL  
SFDEFLAVALKQSSLMVESLVQKLAHG

### >MmSAHH

MGSSHHHHHHHSSGLVPRGSHMSDKLPYKVADIGLAAWGRKALDIAENEMPGLMRMREMYASASKPLKGARIAGCLH  
MTVETAVLIETLVALGAEVRWSSCNIFSTQDHAAAAIAKAGIPVFAWKGETDEEYLWCIEQTLHFKDGPLNMILD  
DGGDLTNLIHTKYPQLLSGIRGISEETTTGVHNLKMMNSGILKVPAINVNDVTKSKFDNLYGCRESLIDGIKR  
ATDVMIAGKVAVVAGYGDVKGCAQALRGFGARVITEIDPINALQAAMEGYEVTMTDEACKENIFVTTTGCVD  
IILGRHFEQMKDDAIVCNIGHFDVEIDVKWLNENAVEKVNKQVDRYWLKNGRRIILAEGRVLNLCAMGHPS  
FVMSNSFTNQVMAQIELWTHPKYPVGVHFLPKKLEAVAEAHLGKLNKLTCLTEKQAQYLGMPINGPFPKPDHY  
RY

### >RgANMT

MGSSHHHHHHHSSGLVPRGSHMGSLSESHTQYKHGVEVEEEDDEESYSRAMQLSMAIVLPMATQSAIQLGVFEIIAK  
APGGRLSASEIATILQAQNPKAPVMLDRMLRLLVSHRVLDCSVSGPAGERLYGLTSVSKYFVDPDQDASLGNFMA  
LPLDKVFMESWMGVKGAVMGEGGIPFNRVHGMHIFEYASSNSKFSPTYHRAMFNHSTIALKRILEHYKGFENVTKL  
VDVGGGLGVTLSMIASKYPHIQAINFDLPHVVQDAASYPGVEHVGGNMFESVPEGDAILMKWILHCWDDEQCLRI  
LKNCYKATPENKQVIVMNSVVPETPEVSSSARETSLLDVLLMTRDGGGRERTQKEFTELAIGAGFKGINFACCCV  
NLHIMEFFK

### >RnBHMT

MGSSHHHHHHHSSGLVPRGSHMAPIAGKAKRGILERLNAGEVVIIDGGGFVFALEKRGYVKAGPWPTEAAVEHPEA  
VRQLHREFLRAGSNVMQTFTFYASEDKLENRGNVAEKISGQKVNEAACDIARQVADEGDALVAGGVSQTPSYLS  
CKSETEVKKIFHQQLEVFMKKNVDFLIAEYFEHVEEAVWAVEALKTSGKPIAATMCIGPEGLHGVSPGECAVRL  
VKAGAAIVGVNCHFDPTSLQTIKLMKEGLEAARLKAYLMSHALAYHTPDCGKQGFIDLPEFPFGLPRVATRWD  
IQKYAREAYNLGVRYIGGCCGFEPYHIRAIAEELAPERGFLLPASEKHGWSGSLDMHTKPIRARARKEYWQNL  
RIASGRPYNPSMSKPDAGVTKGAAELMQQKEATTEQQLRALFEKQKFKSAQ

### >RnCOMT

MGSSHHHHHHHSSGLVPRGSHMGDTKEQRILRYVQQNAKPGDPQSVLEAIDTYCTQKEWAMNVGDAKQIMDAVIR  
EYSPSLVLELGAYCGYSAVRMARLLQPGARLLTMENPNPYAAITQQMLNFAQLQDKVTILNGASQDLIPQLKKKY

DVDTLDMVFLDHWKDRYLPDTLLLEKCGLLRKGTVLLADNVIVPGTPDFLAYVRGSSSFECTHYSSYLEYMKVVD  
GLEKAIYQGPSSPKS

>ScADK

MGTAPLVVLGNPLLDQADVTAEYLAKEYSLKENDAILVDAKSGDAKMAIFDELLQMPETKLVAGGAAQNTARGAA  
YVLGAGQVVYFGSVGKDKFSERLLNENEKAGVKSMYQVQNDIGTGKCAALITGHNRSLVTDLGAANFFTPDHLDK  
HWDLVEAAKLFYIGGFHLTVSPDAIVKLGQHAKENSKPFVLNFSAPFIPHVFKDALARVLPYATVI IANESAEAE  
FCDAFQLDCANTDLEAIAQRIVKDSPVEKTVIFTHGVEPTVVVSSKGTSTYPVKPLDSSKIVDTNGAGDAFAGGF  
MAGLTKGEDLETSIDMGQWLAALSIQEVGPSYPSEKISYSKLEHHHHHH

>ScHSMT

MGSSHHHHHHSSGLVPRGSHMKRIPIKELIVEHPGKVLILDGGQGTENRGININSPVWSAAPTSESEFWEPSS  
QERKVVVEEMRDFMIAGANILMTITYQANFQSISENTSIKTLAAYKRFLDKIVSFTREFIGEERYLIGSIGPWAA  
HVSCEYTG DYGPHPENIDYGGFFKPQLENFNQNRDIDLIGFETIPNFHELKAILSWEDEIISKPFYIGLSVDDNS  
LLRDGTTLEEISVHIKGLGNKINKNLLLMGVNVCVSFNQALILKMLHEHLPGMPLLVYPNSGEIYNPKEKTWHRP  
TNKLDWETT VKKFVDNGARIIGGCCRTSPKDIAEIASAVDKYS

>SmPPK2

MGSSHHHHHHSSGLVPRGSHMALDEAPAEARPGSRAVELEIDGRSRIFDIDDPDLPKWIDEEAFRSDDYPYKKKL  
DREYEETLTKLQIELVKVQFWMQATGKRVMAVFEGRDAAGKGGAIHATTANMNPRSARVVALTKPTETERGQWY  
FQRYVATFPTAGEFVLFDRSWYNRAGVEPVMGFCTPDQYEQFLKEAPRFEEMIANEGIHLEKFWINIGREMQLKR  
FHDRRHDPKIKWKLSPMDIAALSKWDDYTGKRDRMLKETHTEHGPWAVIRGNDKRRSRINVIRHMLTKLDYDGKD  
EAAIGEVDEKILGSGPGFLR

>TkMAT

MGSSHHHHHHSSGLVPRGSHMAGKVRNIVVEELVRTPVEMQKVELVERKGIHPDSIADGIAEAVSRALSREYVK  
RYGIILHHNTDQVEVVGGRAYPQFGGGEVIKPIYIILS GRAVEMVDREFFPVHEIALKAAKDYLRKAVRHLBLEH  
HVIIDSRIQGGSVDLVGVFNKAKKNPIPLANDTSFGVGYAPLSETEKIVLETEKYLNSDEFKPKYPVAVGEDIKVM  
GLRKGDEIDL TIAAAIVDSEVDNPDDYMAVKEAIYEAAKGIVESHTERPTNIYVNTADDPKEGIYYITVTGTSAE  
AGDDGSVGRGNRVNGLITPNRHMSMEAAAAGKNPVSHVGKIYNILSMLIANDIAEQVEGVVEEYVVRILSQIGKPID  
EPLVASVQIIPKKGYSIDVLQKPAYEIADEWLANITKIQKMILEDKVNVF

## State of the art

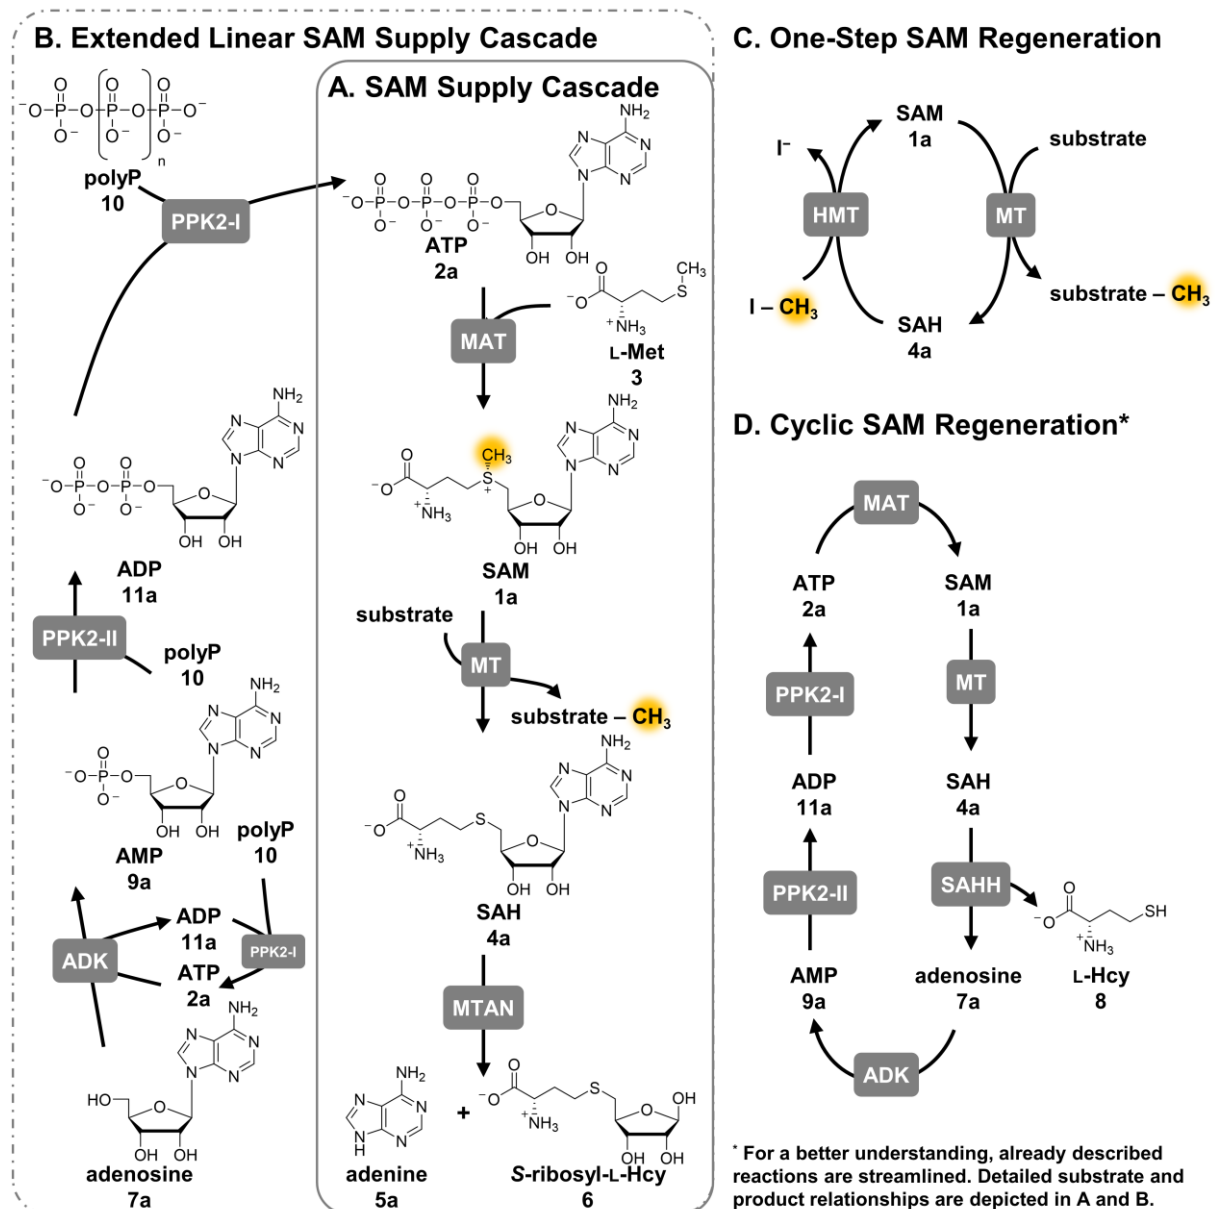

**Fig. S1.** Previously published systems for enzymatic SAM supply or SAM regeneration. A. Three-enzyme SAM supply and SAH degrading cascade employing MAT, MT, and MTAN; B. ATP regeneration coupled to SAM supply using six enzymes starting from adenosine (extended supply cascade); C. SAM regeneration using two enzymes directly methylating SAH back to SAM by HMT with methyl iodide; D. Cyclic SAM regeneration system using six enzymes with AMP as starting cofactor building block. MAT, methionine adenosyltransferase; MT, methyltransferase; MTAN, MTA/SAH nucleosidase; ADK, adenosine kinase; PPK2-I/II, polyphosphate kinases; SAHH, SAH hydrolase; HMT, halide methyltransferase.

**Table S1.** Overview of existing SAM supply and regeneration systems and examples for MT and MT substrate used.

| System                                | Co-factor | Buffer and salts                                                       | Substrates                                                              | Enzymes                                                                                                                                    | Mol% of MT                                | Incubation   | Conversion [%] <sup>[a]</sup> | TTN <sup>[b]</sup>          |
|---------------------------------------|-----------|------------------------------------------------------------------------|-------------------------------------------------------------------------|--------------------------------------------------------------------------------------------------------------------------------------------|-------------------------------------------|--------------|-------------------------------|-----------------------------|
| Supply (3 enzymes) <sup>2</sup>       | SAM       | 100 mM Hepes, pH 8.0, 20 mM MgCl <sub>2</sub> , 200 mM KCl             | 5 mM ATP, 5 mM L-Met, 5 mM <b>12</b>                                    | <i>TkMAT</i> (11 μM), <i>RnCOMT</i> (4 μM), <i>EcMTAN</i> (1 μM)                                                                           | 0.08                                      | 1.5 h, 37 °C | 50                            | n.a. <sup>[c]</sup>         |
| Supply (6 enzymes) <sup>1</sup>       | SAM (ATP) | 50 mM potassium phosphate, pH 7.5, 20 mM MgCl <sub>2</sub> , 50 mM KCl | 20 mM polyP, 3 mM L-Met, 3 mM adenosine, 1 μM AMP, 2 mM <b>12</b>       | <i>ScADK</i> (1.3 μM), <i>AjPPK2</i> (0.9 μM), <i>SmPPK2</i> (1.4 μM), <i>EcMAT</i> (11 μM), <i>RnCOMT</i> (19 μM), <i>EcMTAN</i> (3.8 μM) | 0.93                                      | 20 h, 37 °C  | >99                           | n.a. <sup>[c]</sup> (>1980) |
| Supply (6 enzymes) <sup>1</sup>       | SAM (ATP) | 50 mM potassium phosphate, pH 7.5, 20 mM MgCl <sub>2</sub> , 50 mM KCl | 20 mM polyP, 3 mM L-Met, 3 mM adenosine, 1 μM AMP, 2 mM <b>18</b>       | <i>ScADK</i> (1.3 μM), <i>AjPPK2</i> (0.9 μM), <i>SmPPK2</i> (1.4 μM), <i>EcMAT</i> (11 μM), <i>RgANMT</i> (12 μM), <i>EcMTAN</i> (3.8 μM) | 0.59                                      | 20 h, 37 °C  | >85                           | n.a. <sup>[c]</sup> (>1700) |
| Supply (6 enzymes) <sup>1</sup>       | SAE (ATP) | 50 mM potassium phosphate, pH 7.5, 20 mM MgCl <sub>2</sub> , 50 mM KCl | 20 mM polyP, 3 mM L-ethionine, 3 mM adenosine, 1 μM AMP, 2 mM <b>18</b> | <i>ScADK</i> (1.3 μM), <i>AjPPK2</i> (0.9 μM), <i>SmPPK2</i> (1.4 μM), <i>TkMAT</i> (11 μM), <i>RgANMT</i> (12 μM), <i>EcMTAN</i> (3.8 μM) | 0.59                                      | 20 h, 37 °C  | >75                           | n.a. <sup>[c]</sup> (>1500) |
| Regeneration (2 enzymes) <sup>4</sup> | SAM       | 100 mM sodium phosphate, pH 8.0                                        | 20 μM SAH, 4 mM methyl iodide, 2 mM α-ketovaleric acid                  | <i>SgvM</i> (20 μM), <i>HMT</i> (10 μM)                                                                                                    | 1.00 ( <i>SgvM</i> ), 0.50 ( <i>HMT</i> ) | 72 h, 25 °C  | >95                           | 100                         |
| Regeneration (2 enzymes) <sup>4</sup> | SAM       | 100 mM sodium phosphate, pH 8.0                                        | 20 μM SAH, 20 mM methyl iodide, 8 mM histidine                          | <i>EgtD</i> (20 μM), <i>HMT</i> (10 μM)                                                                                                    | 1.00 ( <i>EgtD</i> ), 0.50 ( <i>HMT</i> ) | 48 h, 25 °C  | 48                            | 580                         |

|                                          |     |                                                                                          |                                                                                           |                                                                                                                                  |                                                      |                |    |    |
|------------------------------------------|-----|------------------------------------------------------------------------------------------|-------------------------------------------------------------------------------------------|----------------------------------------------------------------------------------------------------------------------------------|------------------------------------------------------|----------------|----|----|
| Regeneration<br>(2 enzymes) <sup>7</sup> | SAE | 50 mM<br>chloride-free<br>sodium<br>phosphate,<br>pH 7.5                                 | 100 μM<br>SAH,<br>80 mM ethyl<br>iodide,<br>10 mM<br>luteolin                             | IeOMT<br>T133M-<br>Y326L<br>(292 μM),<br>A#HMT-<br>V140T<br>(364 μM)                                                             | 2.92<br>(IeOMT<br>T133M-<br>Y326L),<br>3.64<br>(HMT) | 72 h,<br>25 °C | 41 | 41 |
| Regeneration<br>(2 enzymes) <sup>7</sup> | SAA | 50 mM<br>chloride-free<br>sodium<br>phosphate,<br>pH 7.5                                 | 100 μM<br>SAH,<br>80 mM allyl<br>iodide,<br>10 mM 3,4-<br>dihydroxy-<br>benzalde-<br>hyde | human<br>COMT<br>(292 μM),<br>A#HMT-<br>V140T<br>(291 μM)                                                                        | 2.92<br>(IeOMT),<br>2.91<br>(HMT)                    | 24 h,<br>25 °C | 48 | 48 |
| Regeneration<br>(6 enzymes) <sup>1</sup> | SAM | 50 mM<br>potassium<br>phosphate,<br>pH 7.5,<br>20 mM<br>MgCl <sub>2</sub> ,<br>50 mM KCl | 20 mM<br>polyP,<br>3 mM L-Met,<br>40 μM AMP,<br>2 mM <b>12</b>                            | ScADK<br>(1.3 μM),<br>AjPPK2<br>(0.9 μM),<br>SmPPK2<br>(1.4 μM),<br>EcMAT<br>(11 μM),<br>RnCOMT<br>(19 μM),<br>MmSAHH<br>(10 μM) | 0.93                                                 | 20 h,<br>37 °C | 20 | 10 |
| Regeneration<br>(6 enzymes) <sup>1</sup> | SAM | 50 mM<br>potassium<br>phosphate,<br>pH 7.5,<br>20 mM<br>MgCl <sub>2</sub> ,<br>50 mM KCl | 20 mM<br>polyP,<br>3 mM L-Met,<br>40 μM AMP,<br>2 mM <b>18</b>                            | ScADK<br>(1.3 μM),<br>AjPPK2<br>(0.9 μM),<br>SmPPK2<br>(1.4 μM),<br>EcMAT<br>(11 μM),<br>RgANMT<br>(12 μM),<br>MmSAHH<br>(10 μM) | 0.59                                                 | 20 h,<br>37 °C | 22 | 11 |
| Regeneration<br>(6 enzymes) <sup>1</sup> | SAE | 50 mM<br>potassium<br>phosphate,<br>pH 7.5,<br>20 mM<br>MgCl <sub>2</sub> ,<br>50 mM KCl | 20 mM<br>polyP,<br>3 mM L-<br>ethionine,<br>40 μM AMP,<br>2 mM <b>18</b>                  | ScADK<br>(1.3 μM),<br>AjPPK2<br>(0.9 μM),<br>SmPPK2<br>(1.4 μM),<br>EcMAT<br>(11 μM),<br>RgANMT<br>(12 μM),<br>MmSAHH<br>(10 μM) | 0.59                                                 | 20 h,<br>37 °C | 19 | 10 |

[a] Conversion based on MT reaction. [b] The number of cycles was calculated based on the ratio of alkylated product to catalytic amount of AMP. [c] n.a. – not applicable; the cofactor was not regenerated, but supplied in the reaction, and thus no TTN was calculated.

**Table S2.** Selected studies using (co)substrate analogues with enzymes from the SAM regeneration system.

| Enzyme class                                                                                                     | Organism/ enzyme name                                                                                    | Accepted substrates                                                                                                                                |
|------------------------------------------------------------------------------------------------------------------|----------------------------------------------------------------------------------------------------------|----------------------------------------------------------------------------------------------------------------------------------------------------|
| MAT                                                                                                              | <i>Cryptosporidium hominis</i>                                                                           | Natural (hypoxanthine) and non-natural nucleobase analogues with allyl or propargyl group (medium conv.) <sup>8</sup>                              |
|                                                                                                                  |                                                                                                          | Selenium analogues of L-methionine with other modifications (medium conv.) <sup>8</sup>                                                            |
|                                                                                                                  | <i>E. coli</i>                                                                                           | L-Ethionine (low conv.) <sup>9,10</sup>                                                                                                            |
|                                                                                                                  |                                                                                                          | Selenium analogues of L-methionine (high conv.) <sup>10</sup> and longer alkyl, allyl, alkenyl, alkynyl groups (very low conv.) <sup>10</sup>      |
|                                                                                                                  | <i>Homo sapiens</i> (MAT 2A)                                                                             | Analogues of L-methionine with longer alkyl, allyl, alkenyl, alkynyl groups (very low conv.) <sup>10</sup>                                         |
|                                                                                                                  |                                                                                                          | L-Ethionine (high conv.) <sup>10</sup>                                                                                                             |
|                                                                                                                  |                                                                                                          | Selenium analogues of L-methionine (high conv.) <sup>10</sup> and longer alkyl, allyl, alkenyl, alkynyl groups (low to medium conv.) <sup>10</sup> |
|                                                                                                                  |                                                                                                          | Analogues of L-methionine with longer alkyl, allyl, alkenyl, alkynyl groups (low to medium conv.) <sup>10</sup>                                    |
|                                                                                                                  | <i>Methanocaldococcus jannaschii</i>                                                                     | Analogues of L-methionine with modified carboxylate moieties (low to high conv.) <sup>11,12</sup>                                                  |
|                                                                                                                  |                                                                                                          | L-Ethionine (high conv.) <sup>9,10</sup>                                                                                                           |
| Natural (cytosine, guanine, hypoxanthine, uracil) and non-natural nucleobase analogues (high conv.) <sup>9</sup> |                                                                                                          |                                                                                                                                                    |
| MT                                                                                                               | <i>CouO/ Streptomyces rishiriensis</i>                                                                   | Selenium analogues of L-methionine (high conv.) <sup>10</sup> and longer alkyl, allyl, alkenyl, alkynyl groups (low to high conv.) <sup>10</sup>   |
|                                                                                                                  |                                                                                                          | Analogues of L-methionine with longer alkyl, allyl, alkenyl, alkynyl groups (low to medium conv.) <sup>10</sup>                                    |
|                                                                                                                  | <i>DnrK/ Streptomyces peucetius</i>                                                                      | Non-natural nucleobase SAM analogue (medium conv.) <sup>8</sup>                                                                                    |
|                                                                                                                  |                                                                                                          | Selenium analogue with propargyl group (high conv.) <sup>8</sup>                                                                                   |
|                                                                                                                  | <i>Ecm1/ Encephalitozoon cuniculi</i>                                                                    | SAM analogue with modified carboxylate moiety <sup>11</sup>                                                                                        |
|                                                                                                                  |                                                                                                          | SAM analogues with photo-cross-linking moieties (high conv.) <sup>13</sup>                                                                         |
|                                                                                                                  |                                                                                                          | Non-natural nucleobase SAM analogue (high conv.) <sup>8</sup>                                                                                      |
|                                                                                                                  | <i>hTGS1/ Homo sapiens</i>                                                                               | Selenium analogue with propargyl group (high conv.) <sup>8</sup>                                                                                   |
|                                                                                                                  |                                                                                                          | Non-natural nucleobase SAM analogue (medium conv.) <sup>8</sup>                                                                                    |
|                                                                                                                  |                                                                                                          | Selenium analogue with propargyl group (low conv.) <sup>8</sup>                                                                                    |
| <i>M.Taq/ Thermus aquaticus, MHhal/ Haemophilus paraahaemolyticus, M.BcnIB/ Bacillus centrosporus</i>            | Alkyl SAM analogues (low to high conv.) <sup>14</sup>                                                    |                                                                                                                                                    |
|                                                                                                                  | Alkyl SAM analogues and SAM analogues with modified carboxylate moiety (low to high conv.) <sup>15</sup> |                                                                                                                                                    |
| <i>NovO/ Streptomyces niveus</i>                                                                                 |                                                                                                          |                                                                                                                                                    |

| Enzyme class | Organism/ enzyme name                            | Accepted substrates                                                                                                                |
|--------------|--------------------------------------------------|------------------------------------------------------------------------------------------------------------------------------------|
|              | <i>RapM/ Streptomyces hygroscopicus</i>          | Ethyl and allyl SAM analogues <sup>16</sup>                                                                                        |
| SAHH         | <i>Alcaligenes faecalis</i>                      | Nucleobase analogues of adenosine (low to high conv.) <sup>17</sup>                                                                |
|              | <i>Methanocaldococcus jannaschii</i>             | Inosine analogues of SAH and adenosine (high conv.) <sup>18</sup>                                                                  |
|              | <i>Mycobacterium tuberculosis</i>                | Ribose analogues of adenosine (low to high conv.) <sup>19</sup>                                                                    |
| ADK          | <i>Saccharomyces cerevisiae</i>                  | Natural nucleobase (cytosine, guanine, hypoxanthine, uracil) and ribose analogues of adenosine (low to medium conv.) <sup>20</sup> |
|              | <i>Trypanosoma brucei</i>                        | Natural nucleotide analogues (CTP, GTP, UTP) and non-natural adenosine analogues <sup>21</sup>                                     |
|              | <i>Francisella tularensis</i>                    | Guanine analogues <sup>22</sup>                                                                                                    |
| PPK2         | <i>Arthrobacter (Paenarthrobacter) aurescens</i> | Guanine analogues <sup>23</sup>                                                                                                    |
|              | <i>Ruegeria pomeroyi</i>                         | Natural nucleobase (cytosine, guanine, uracil) analogues <sup>24</sup>                                                             |
|              | <i>Sinorhizobium meliloti</i>                    | Guanine analogues <sup>25</sup>                                                                                                    |

## Results and discussion

### Starting point for optimisation

**Table S3.** Enzymes used in this study and their UniProt accession numbers (gene and protein sequences are given above).

| Enzyme         | UniProt accession number |
|----------------|--------------------------|
| <i>Aj</i> PPK2 | Q83XD3 (Q83XD3_ACIJO)    |
| <i>Ec</i> MAT  | P0A817 (METK_ECOLI)      |
| <i>Ec</i> MTAN | P0AF12 (MTNN_ECOLI)      |
| <i>Mm</i> SAHH | P50247 (SAHH_MOUSE)      |
| <i>Rg</i> ANMT | A9X7L0 (ANMT_RUTGR)      |
| <i>Rn</i> BHMT | O09171 (BHMT1_RAT)       |
| <i>Rn</i> COMT | P22734 (COMT_RAT)        |
| <i>Sc</i> ADK  | P47143 (ADK_YEAST)       |
| <i>Sc</i> HSMT | Q08985 (SAM4_YEAST)      |
| <i>Sm</i> PPK2 | Q92SA6 (Q92SA6_RHIME)    |
| <i>Tk</i> MAT  | Q5JF22 (METK_THEKO)      |

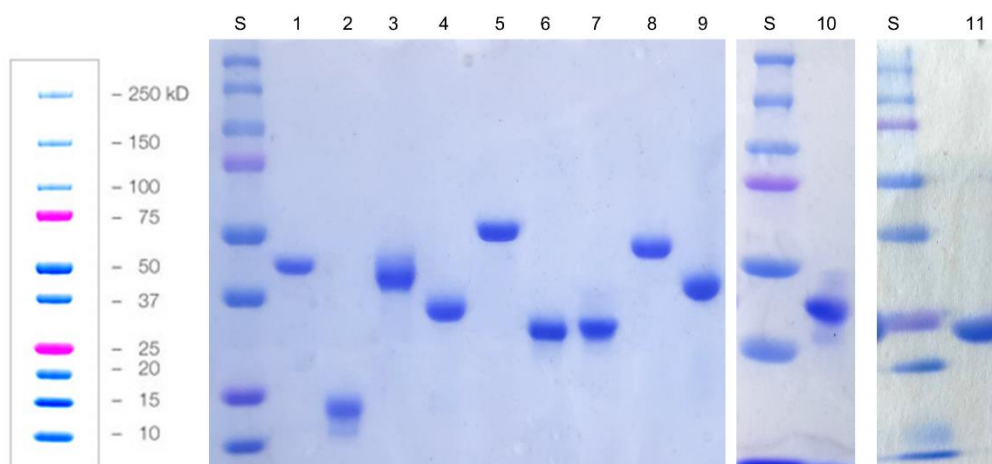

**Fig. S2.** SDS-PAGE analysis of purified proteins. For each protein 2  $\mu$ g was applied; S – standard, 1 – *Ec*MAT (44 kDa), 2 – *Rn*COMT (27 kDa), 3 – *Mm*SAHH (50 kDa), 4 – *Sc*ADK (37 kDa), 5 – *Aj*PPK2 (58 kDa), 6 – *Sm*PPK2 (37 kDa), 7 – *Sc*HSMT (39 kDa), 8 – *Tk*MAT (47 kDa), 9 – *Rg*ANMT (42 kDa), 10 – *Rn*BHMT (47 kDa), 11 – *Ec*MTAN (27 kDa), the calculated molecular weight always includes the His<sub>6</sub>-tag. Standard taken from <https://www.bio-rad.com/en-de/sku/1610374-precision-plus-protein-dual-color-standards-500-ul?ID=1610374>.



**Table S4.** HPLC retention times and calibration curves (n.d. – not determined).

| Substance                                     | Retention time [min] | Calibration curve | R <sup>2</sup> |
|-----------------------------------------------|----------------------|-------------------|----------------|
| ATP ( <b>2a</b> )                             | 1.7                  | n.d.              | n.d.           |
| ADP ( <b>11a</b> )                            | 1.9                  | n.d.              | n.d.           |
| AMP ( <b>9a</b> )                             | 2.0                  | n.d.              | n.d.           |
| Adenosine ( <b>7a</b> )                       | 7.8                  | n.d.              | n.d.           |
| SAM ( <b>1a</b> )                             | 1.6                  | n.d.              | n.d.           |
| SAH ( <b>4a</b> )                             | 8.1                  | n.d.              | n.d.           |
| MTA                                           | 8.4                  | n.d.              | n.d.           |
| Adenine ( <b>5a</b> )                         | 9.2                  | n.d.              | n.d.           |
| ITP ( <b>2c</b> )                             | 1.3                  | n.d.              | n.d.           |
| IDP ( <b>11c</b> )                            | 1.3                  | n.d.              | n.d.           |
| IMP ( <b>9c</b> )                             | 1.5                  | n.d.              | n.d.           |
| Inosine ( <b>7c</b> )                         | 2.8                  | n.d.              | n.d.           |
| Hypoxanthine ( <b>5c</b> )                    | 3.2                  | n.d.              | n.d.           |
| CTP ( <b>2d</b> )                             | 1.3                  | n.d.              | n.d.           |
| CDP ( <b>11d</b> )                            | 1.5                  | n.d.              | n.d.           |
| CMP ( <b>9d</b> )                             | 2.0                  | n.d.              | n.d.           |
| Cytidine ( <b>7d</b> )                        | 7.8                  | n.d.              | n.d.           |
| Cytosine ( <b>5d</b> )                        | 10.0                 | n.d.              | n.d.           |
| 7-Deazadenosine (Tubercidin, <b>7b</b> )      | 12.3                 | n.d.              | n.d.           |
| 3,4-Dihydroxybenzoic acid ( <b>12</b> )       | 2.3                  | 324.7 x           | >0.99          |
| Vanillic acid ( <b>13</b> )                   | 3.3                  | 371.4 x           | >0.99          |
| Isovanillic acid ( <b>14</b> )                | 4.5                  | 465.4 x           | >0.99          |
| Anthranilic acid ( <b>18</b> )                | 4.0                  | 91.1 x            | >0.99          |
| <i>N</i> -Methylantranilic acid ( <b>19</b> ) | 7.5                  | 151.4 x           | >0.99          |
| <i>N</i> -Ethylantranilic acid                | 7.9                  | 163.9 x           | >0.99          |

### Quantitative data for MT conversion and TTNs

For all regeneration systems, the MAT, MT, MT substrate, and cofactor building block used are given, as well as if the L-methionine regeneration system was in place. The regeneration systems start from the monophosphorylated nucleotide in catalytic amount and for methylation 2 mM MT substrate was supplied, if not otherwise stated. Conversions are based on the MT reaction; conversions and total turnover numbers (TTN) are given as mean values  $\pm$  standard deviation. All reactions were performed and analysed in triplicates. TTNs were calculated as

the amount of MT product formed divided by the catalytic amount of AMP added to the reaction. The maximum possible TTNs for 2 mM MT substrate and 40, 20, or 10  $\mu$ M cofactor building block are consequently 50, 100, or 200 TTNs, respectively. Increasing the MT substrate to 5 mM and adding 100, 40, 20, or 10  $\mu$ M cofactor building block correspond to turnovers of at most 50, 125, 250, or 500, respectively.

**Table S5.** Results from SAM regeneration systems using enzymes produced in *E. coli* BL21-Gold(DE3) strain with AMP as cofactor building block and different L-methionine regeneration systems.

| MAT                                        | MT                     | Substrate                                         | L-Methionine Regeneration                  | AMP [ $\mu$ M] | Conv. [%]     | N° of cycles  |
|--------------------------------------------|------------------------|---------------------------------------------------|--------------------------------------------|----------------|---------------|---------------|
| <i>EcMAT</i>                               | <i>RnCOMT</i>          | 12                                                | no                                         | 40             | 92 $\pm$ 2.2  | 46 $\pm$ 1.1  |
|                                            |                        |                                                   |                                            | 20             | 68 $\pm$ 1.0  | 68 $\pm$ 1.0  |
|                                            |                        |                                                   |                                            | 10             | 47 $\pm$ 0.7  | 95 $\pm$ 1.5  |
|                                            |                        |                                                   |                                            | 0              | 9.9 $\pm$ 0.3 | n.a.          |
|                                            |                        |                                                   | ScHSMT<br>3 mM D/L-SMM<br>40 $\mu$ M L-Met | 40             | >99 $\pm$ 0.0 | 50 $\pm$ 0.0  |
|                                            |                        |                                                   |                                            | 20             | >99 $\pm$ 0.0 | 100 $\pm$ 0.0 |
|                                            |                        |                                                   |                                            | 10             | >99 $\pm$ 0.0 | 200 $\pm$ 0.0 |
|                                            |                        |                                                   |                                            | 0              | 25 $\pm$ 1.4  | n.a.          |
|                                            | ScHSMT<br>3 mM D/L-SMM | 40                                                | >99 $\pm$ 0.0                              | 50 $\pm$ 0.0   |               |               |
|                                            |                        | 20                                                | >99 $\pm$ 0.0                              | 100 $\pm$ 0.0  |               |               |
|                                            |                        | 10                                                | 82 $\pm$ 2.8                               | 164 $\pm$ 5.7  |               |               |
|                                            |                        | <i>RnBHMT</i><br>3 mM betaine<br>40 $\mu$ M L-Met | 40                                         | 16 $\pm$ 0.9   | 8 $\pm$ 0.5   |               |
|                                            | 20                     |                                                   | 13 $\pm$ 0.3                               | 13 $\pm$ 0.3   |               |               |
|                                            | 10                     |                                                   | 9 $\pm$ 0.4                                | 17 $\pm$ 0.9   |               |               |
|                                            | <i>RgANMT</i>          | 18                                                | no                                         | 40             | 59 $\pm$ 3.1  | 30 $\pm$ 1.5  |
|                                            |                        |                                                   |                                            | 20             | 39 $\pm$ 1.8  | 39 $\pm$ 1.8  |
| 10                                         |                        |                                                   |                                            | 27 $\pm$ 1.4   | 59 $\pm$ 2.9  |               |
| ScHSMT<br>3 mM D/L-SMM<br>40 $\mu$ M L-Met |                        |                                                   | 40                                         | 81 $\pm$ 0.6   | 41 $\pm$ 0.3  |               |
|                                            |                        |                                                   | 20                                         | 53 $\pm$ 3.3   | 53 $\pm$ 3.3  |               |
|                                            |                        |                                                   | 10                                         | 38 $\pm$ 1.6   | 75 $\pm$ 3.1  |               |

n.a.; not applicable, as the number of cycles is calculated from the cofactor building block added to the system.

**Table S6.** Results from cofactor regeneration systems using enzymes produced in *E. coli* BL21-Gold(DE3) strain with AMP analogues as cofactor building block and use of ScHSMT for L-methionine regeneration.

| MAT          | MT            | Substrate | L-Methionine Regeneration                  | NMP [ $\mu$ M]          | Conv. [%]                         | N° of cycles |
|--------------|---------------|-----------|--------------------------------------------|-------------------------|-----------------------------------|--------------|
| <i>EcMAT</i> | <i>RnCOMT</i> | 12        | no                                         | AMP [1]                 | 43 $\pm$ 1.5                      | 22 $\pm$ 0.8 |
| <i>TkMAT</i> |               |           |                                            | <sup>7dz</sup> ADO [40] | 23 $\pm$ 0.4                      | 11 $\pm$ 0.2 |
|              |               |           | no                                         |                         | 65 $\pm$ 1.3                      | 32 $\pm$ 0.6 |
|              |               |           | ScHSMT<br>3 mM D/L-SMM<br>40 $\mu$ M L-Met | AMP [40]                | 83 $\pm$ 0.1                      | 42 $\pm$ 0.0 |
|              |               |           | no                                         |                         | 20 $\pm$ 0.5<br>( $p < 0.0001$ )* | 10 $\pm$ 0.3 |
| <i>TkMAT</i> | <i>RnCOMT</i> | 12        | ScHSMT<br>3 mM D/L-SMM<br>40 $\mu$ M L-Met | CMP [40]                | 38 $\pm$ 1.9<br>( $p = 0.0007$ )* | 19 $\pm$ 1.0 |
|              |               |           |                                            |                         |                                   |              |
|              |               |           | ScHSMT<br>3 mM D/L-SMM<br>40 $\mu$ M L-Met | IMP [40]                | 33 $\pm$ 2.8<br>( $p = 0.0115$ )* | 16 $\pm$ 1.4 |

\*compared to the conv. without cofactor building block added (Table S5)

**Table S7.** Results from SAM regeneration systems using enzymes produced in *E. coli*  $\Delta$ *mtn* (DE3) strain with AMP as cofactor building block and L-methionine regeneration systems.

| MAT          | MT            | Substrate | L-Methionine Regeneration | AMP [ $\mu$ M]                             | Conv. [%]    | N° of cycles  |
|--------------|---------------|-----------|---------------------------|--------------------------------------------|--------------|---------------|
|              |               |           |                           | 40                                         | 99 $\pm$ 0.3 | 50 $\pm$ 0.1  |
|              |               |           | no                        | 20                                         | 85 $\pm$ 0.1 | 85 $\pm$ 0.1  |
| <i>EcMAT</i> | <i>RnCOMT</i> | 12        |                           | 10                                         | 54 $\pm$ 1.1 | 108 $\pm$ 2.3 |
|              |               |           |                           | ScHSMT<br>3 mM D/L-SMM<br>40 $\mu$ M L-Met | 40           | >99 $\pm$ 0.0 |
|              |               |           |                           | 20                                         | 99 $\pm$ 1.6 | 99 $\pm$ 1.6  |
|              |               |           |                           | 10                                         | 64 $\pm$ 0.2 | 129 $\pm$ 0.4 |
|              |               |           |                           | 40                                         | 61 $\pm$ 5.8 | 31 $\pm$ 2.9  |
|              |               |           | no                        | 20                                         | 46 $\pm$ 0.5 | 46 $\pm$ 0.5  |
| <i>EcMAT</i> | <i>RgANMT</i> | 18        |                           | 10                                         | 35 $\pm$ 6.0 | 74 $\pm$ 12.0 |
|              |               |           |                           | ScHSMT<br>3 mM D/L-SMM<br>40 $\mu$ M L-Met | 40           | 75 $\pm$ 2.4  |
|              |               |           |                           | 20                                         | 78 $\pm$ 6.6 | 78 $\pm$ 6.6  |
|              |               |           |                           | 10                                         | 61 $\pm$ 4.8 | 123 $\pm$ 9.5 |

**Table S8.** Results from SAE regeneration systems using enzymes produced in *E. coli* BL21-Gold(DE3) strain or *E. coli*  $\Delta mtn$  (DE3) strain with AMP as cofactor building block.

| MAT   | MT     | Substrate | AMP [ $\mu$ M] | <i>E. coli</i> strain | Conv. [%]    | N° of cycles |
|-------|--------|-----------|----------------|-----------------------|--------------|--------------|
| TkMAT | RgANMT | 18        | 40             | BL21-Gold(DE3)        | 20 $\pm$ 1.6 | 10 $\pm$ 0.8 |
|       |        |           |                | $\Delta mtn$ (DE3)    | 23 $\pm$ 0.1 | 11 $\pm$ 0.0 |

**Table S9.** Results from SAM regeneration systems using enzymes produced in *E. coli* BL21-Gold(DE3) strain with AMP as cofactor building block and 5 mM MT substrate.

| MAT   | MT     | Substrate | L-Methionine Regeneration                  | AMP [ $\mu$ M] | Conv. [%]    | N° of cycles  |
|-------|--------|-----------|--------------------------------------------|----------------|--------------|---------------|
| EcMAT | RnCOMT | 12        | no                                         | 100            | 63 $\pm$ 1.0 | 32 $\pm$ 0.5  |
|       |        |           |                                            | 40             | 37 $\pm$ 0.3 | 46 $\pm$ 0.4  |
|       |        |           |                                            | 15             | 23 $\pm$ 0.7 | 76 $\pm$ 2.2  |
|       |        |           |                                            | 10             | 18 $\pm$ 0.6 | 90 $\pm$ 2.8  |
|       |        |           | ScHSMT<br>3 mM D/L-SMM<br>40 $\mu$ M L-Met | 100            | 72 $\pm$ 1.4 | 36 $\pm$ 0.7  |
|       |        |           |                                            | 40             | 47 $\pm$ 3.2 | 58 $\pm$ 4.0  |
|       |        |           |                                            | 15             | 33 $\pm$ 1.1 | 110 $\pm$ 3.6 |
|       |        |           |                                            | 10             | 27 $\pm$ 0.1 | 136 $\pm$ 0.7 |

**Table S10.** Results from SAM regeneration systems using crude lysates produced in *E. coli* BL21-Gold(DE3) strain with AMP as cofactor building block based on the decrease of substrate 12.

| MAT   | MT     | Substrate | L-Methionine Regeneration                  | AMP [ $\mu$ M] | Conv. [%]    | N° of cycles |
|-------|--------|-----------|--------------------------------------------|----------------|--------------|--------------|
| EcMAT | RnCOMT | 12        | no                                         | 40             | 45 $\pm$ 2.1 | 22 $\pm$ 1.1 |
|       |        |           | ScHSMT<br>3 mM D/L-SMM<br>40 $\mu$ M L-Met | 40             | 88 $\pm$ 0.5 | 44 $\pm$ 0.3 |

## Buffer screening

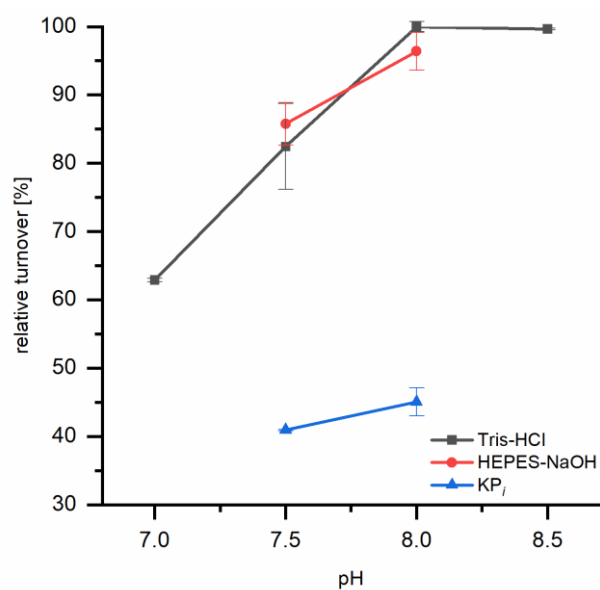

**Fig. S3.** Impact of buffer salt and pH on MT conversion. Tris-HCl pH 8.0, was the optimal buffer choice. The substrate was oxidised at Tris-HCl pH 9.0, and was not included in the data set.

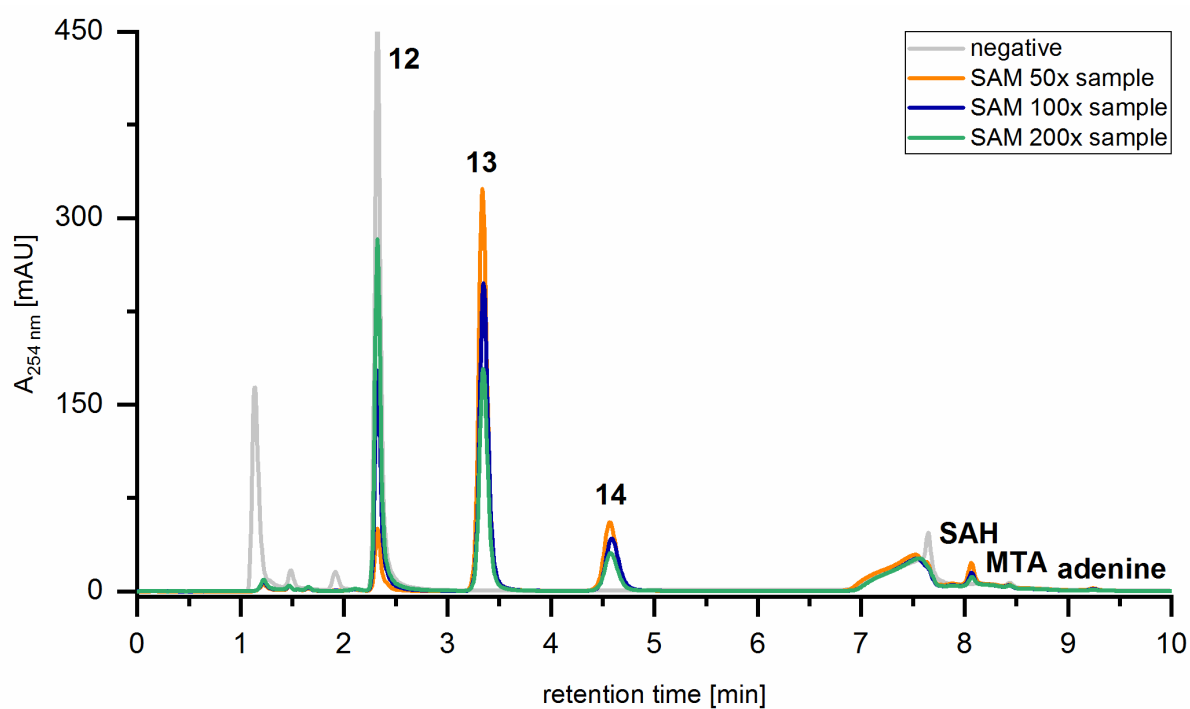

**Fig. S4.** Typical HPLC chromatograms of the SAM regeneration system with *RnCOMT*. Starting material: 2 mM MT substrate **12**, 3 mM L-methionine, 20 mM polyP (calculated as single phosphate residues), AMP (orange – 40  $\mu\text{M}$ , blue – 20  $\mu\text{M}$ , green – 10  $\mu\text{M}$ ).

## Isosteric adenosine analogues are not well tolerated by each cycle enzyme

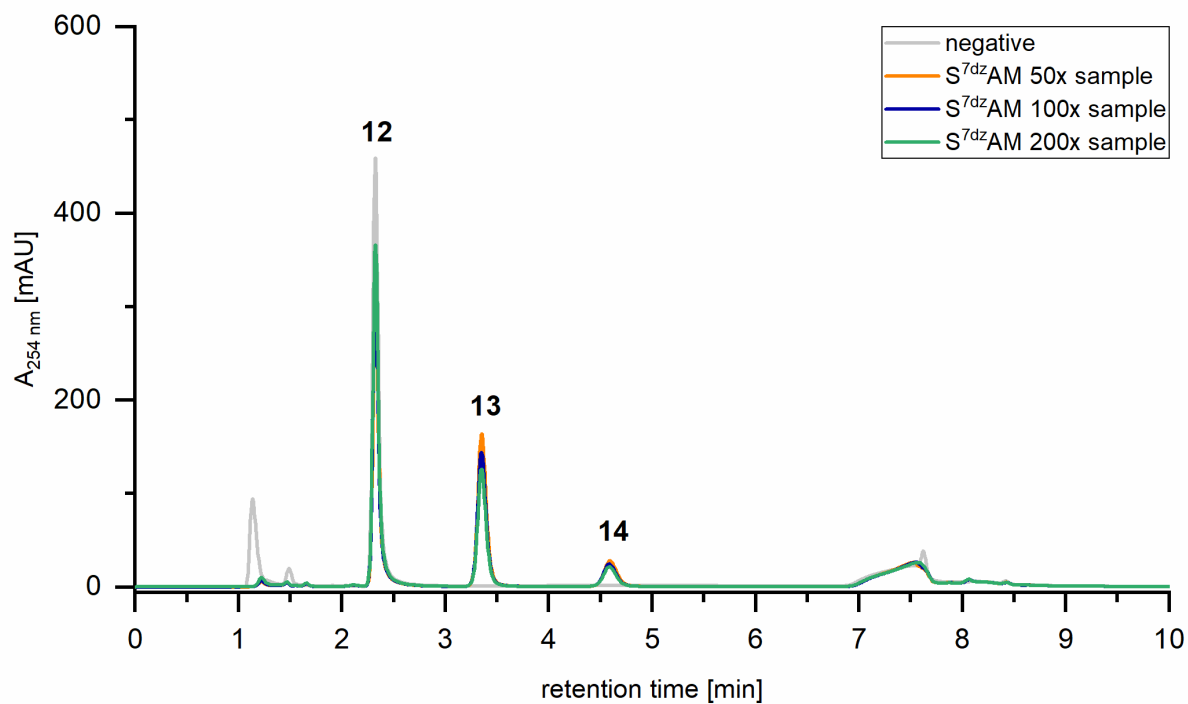

**Fig. S5.** Typical HPLC chromatograms of the S<sup>7dz</sup>AM regeneration system with *RnCOMT*. Starting material: 2 mM MT substrate **12**, 3 mM L-methionine, 20 mM polyP (calculated as single phosphate residues), 1  $\mu$ M AMP, tubercidin (orange – 40  $\mu$ M, blue – 20  $\mu$ M, green – 10  $\mu$ M).

## Co-purified MTAN is not the only reason for adenine accumulation

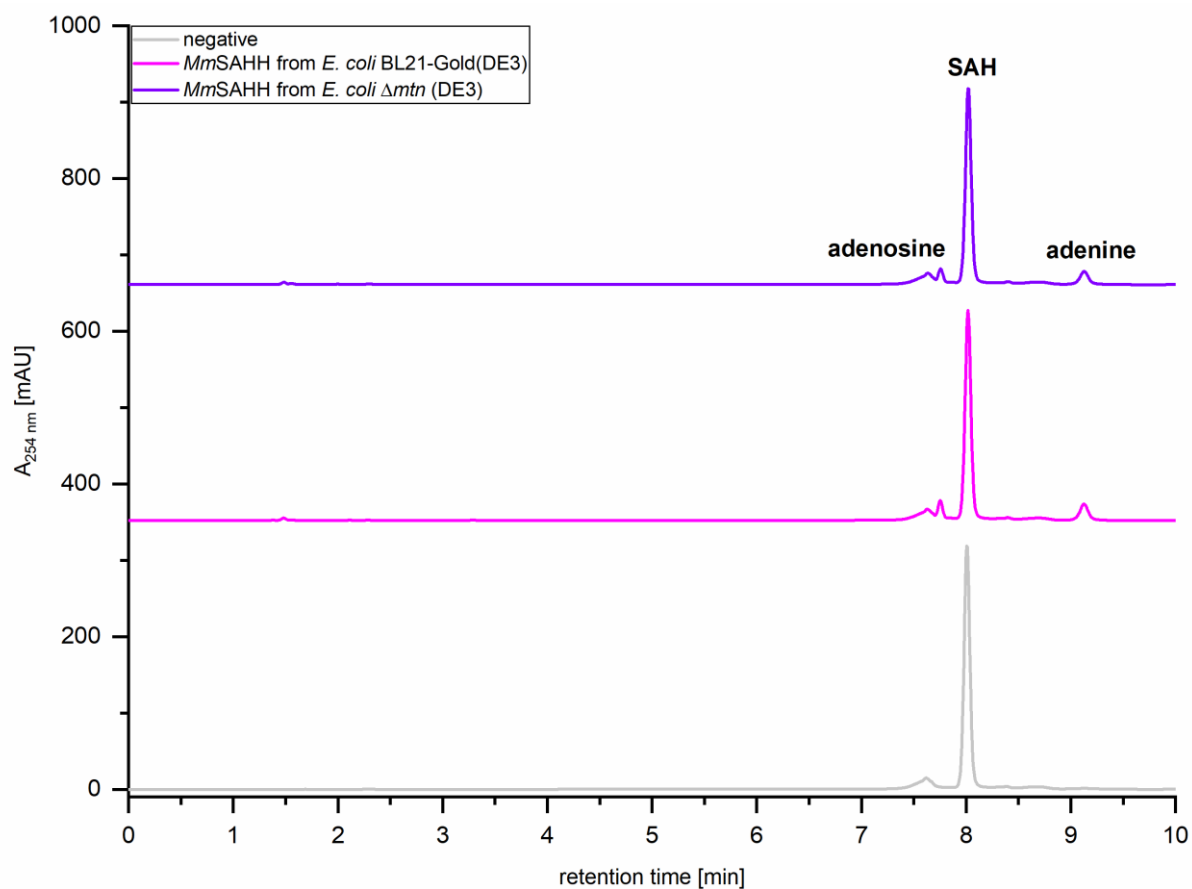

**Fig. S6.** HPLC chromatograms of the hydrolysis of SAH catalysed by either *MmSAHH* purified from the *E. coli* BL21-Gold(DE3) (pink) or *E. coli*  $\Delta mt n$  (DE3) strain (purple) after 20 h. The SAH hydrolysis reaction that is included in the regeneration system is not the preferred *in vitro* reaction of the enzyme and adenine is formed as a side product.

## Options for the removal of L-homocysteine

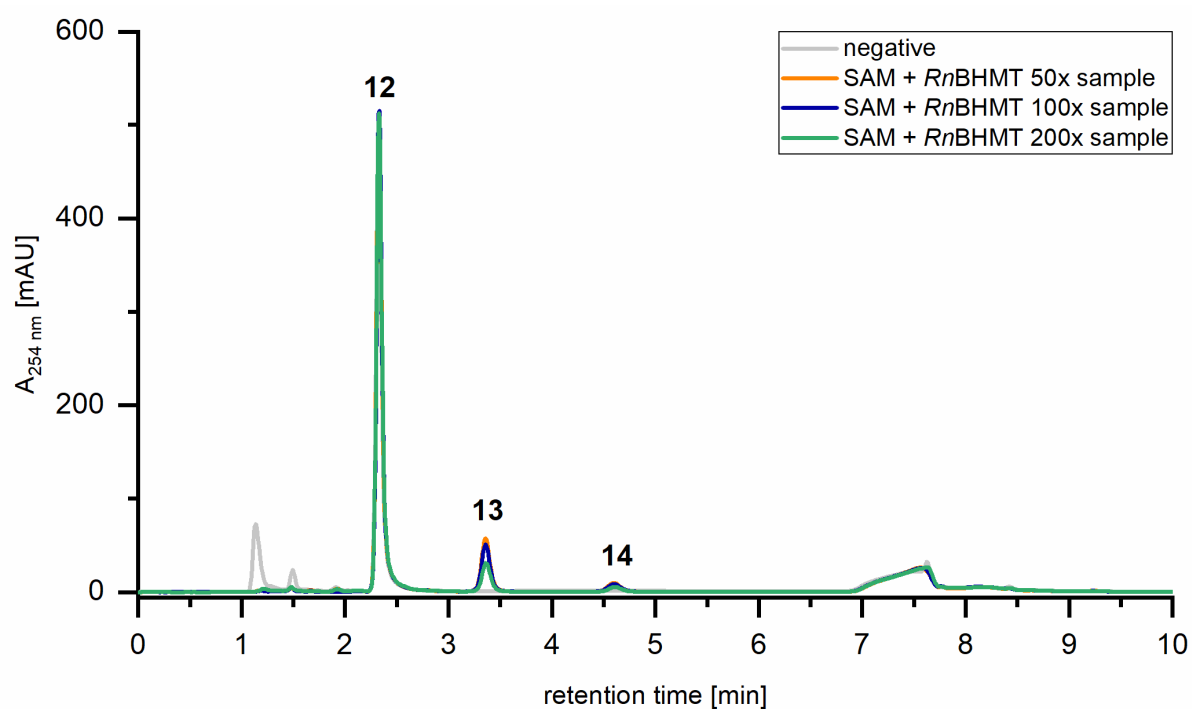

**Fig. S7.** Typical HPLC chromatograms of the SAM regeneration system with *RnCOMT* and additional L-methionine regeneration using *RnBHMT*. Starting material: 2 mM MT substrate **12**, 3 mM betaine, 20 mM polyP (calculated as single phosphate residues), AMP (orange – 40  $\mu\text{M}$ , blue – 20  $\mu\text{M}$ , green – 10  $\mu\text{M}$ ).



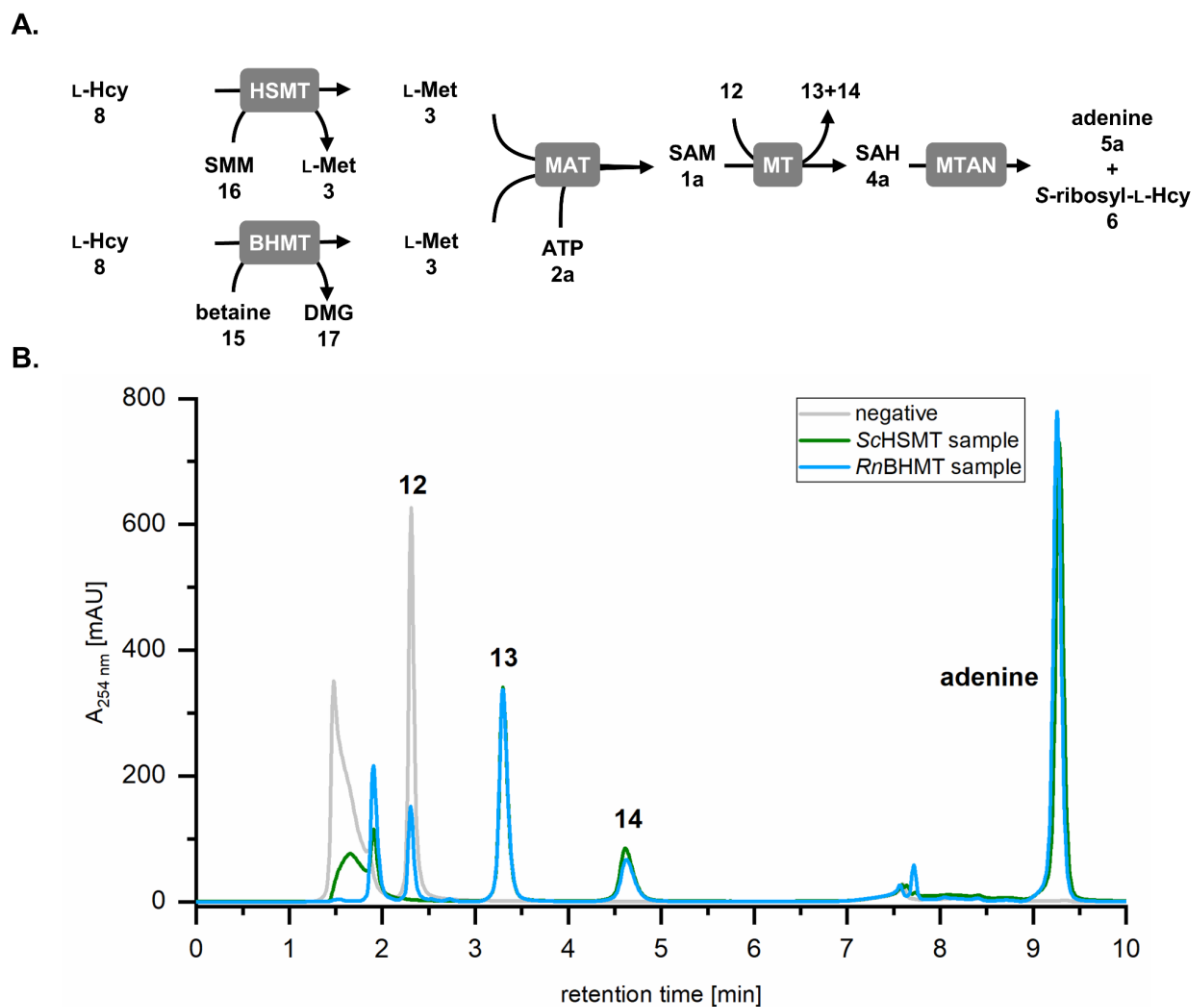

**Fig. S8.** A. Three-enzyme cascade (MAT–MT–MTAN) coupled to either HSMT or BHMT starting from L-homocysteine; B. HPLC chromatograms of the three-enzyme cascade (*Ec*MAT, *Rn*COMT, *Ec*MTAN) coupled to either *Sc*HSMT or *Rn*BHMT starting from L-homocysteine. Starting material: 2 mM MT substrate **12**, 2 mM L-homocysteine, 3 mM D/L-SMM or betaine, 3 mM ATP.

The NMR spectra were recorded on a DRX 400 spectrometer (Bruker, Billerica, MA, USA) operating at 400.1 MHz (for  $^1\text{H}$  NMR). Spectra were analysed with TopSpin 3.6.2 (Bruker, Billerica, MA, USA). All NMR measurements were performed once at 25 °C.

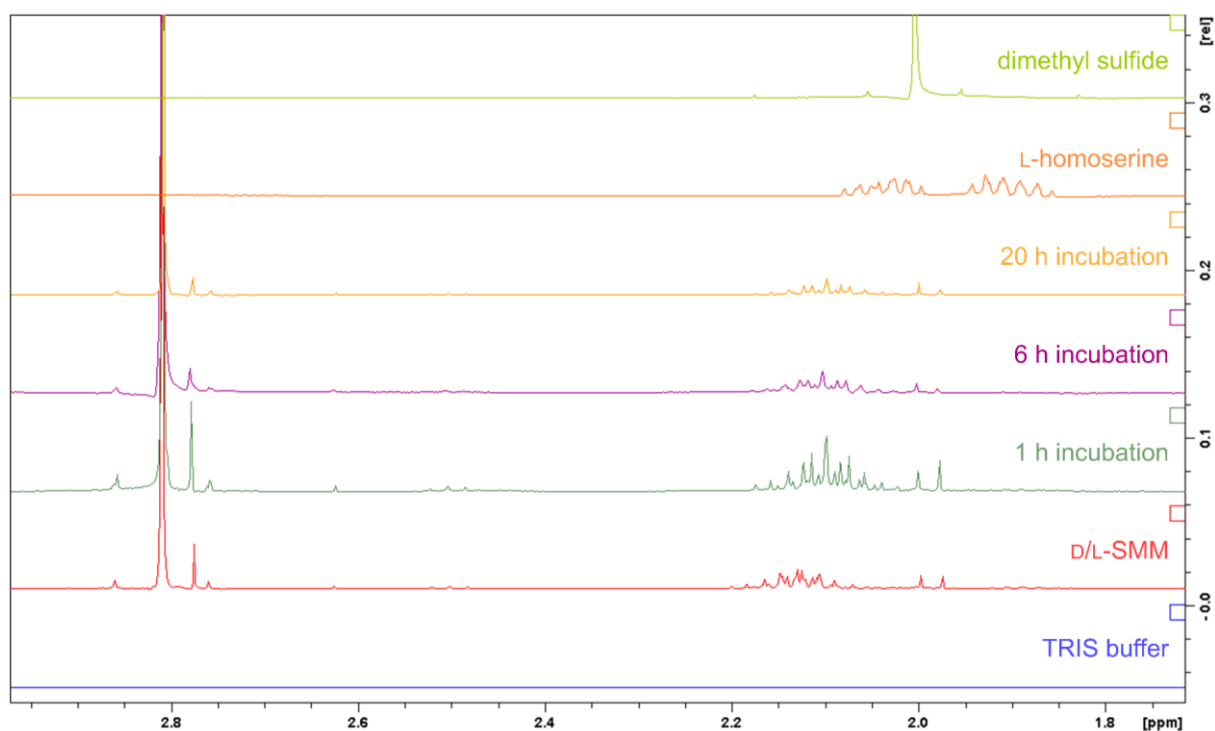

**Fig. S9.**  $^1\text{H}$  NMR spectra of the possible degradation products of D/L-SMM, dimethyl sulfide (light green) and homoserine (orange), compared with D/L-SMM (red) incubated for 1 h (dark green), 6 h (purple) and 20 h (yellow) in buffer (blue) at 37 °C under assay conditions in 5%  $\text{D}_2\text{O}$ . No degradation products were found.

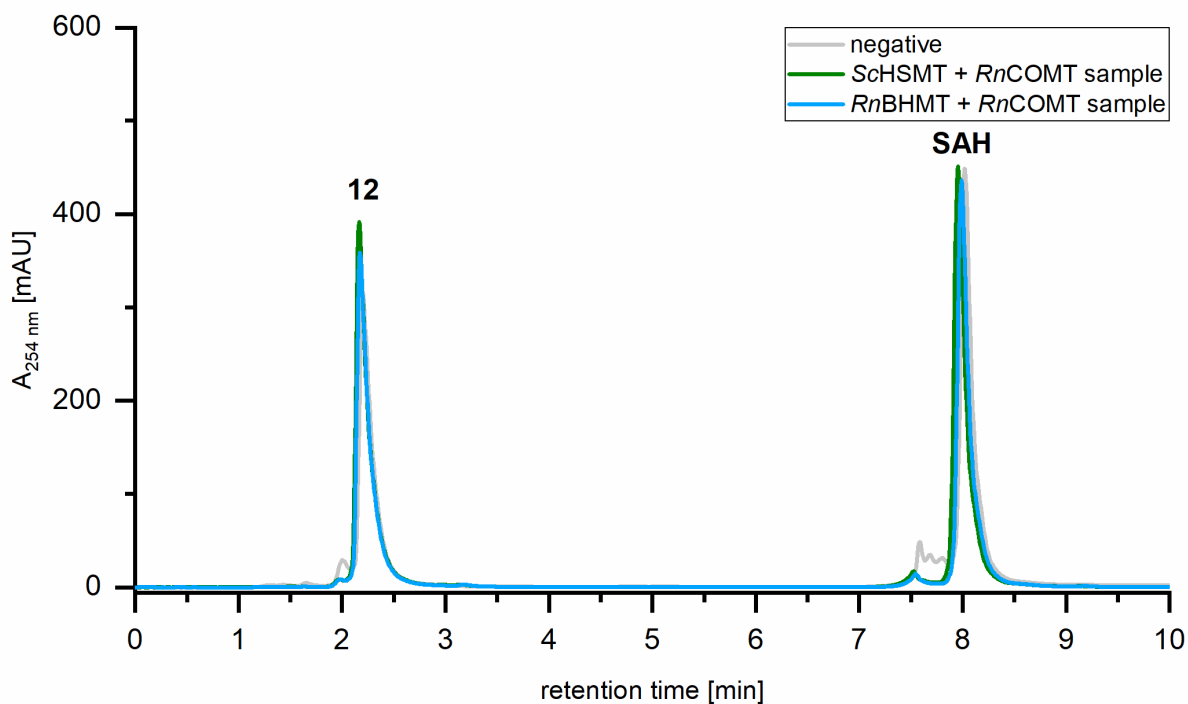

**Fig. S10.** HPLC chromatograms of ScHSMT or *RnBHMT* incubated with *RnCOMT* and SAH and MT substrate **12**. Starting material: 2 mM MT substrate **12**, 1 mM SAH, 2 mM D/L-SMM or 2 mM betaine.

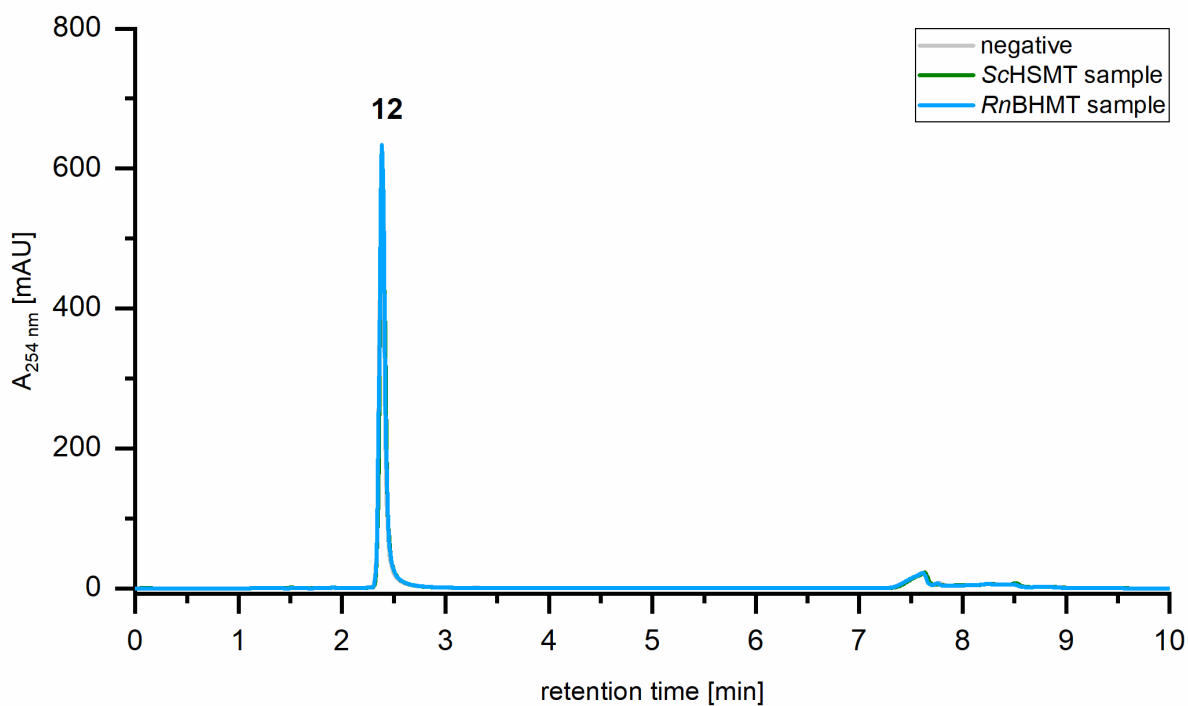

**Fig. S11.** HPLC chromatograms of ScHSMT or *RnBHMT* incubated with **12**. Starting material: 2 mM MT substrate **12**, 3 mM D/L-SMM or 3 mM betaine.

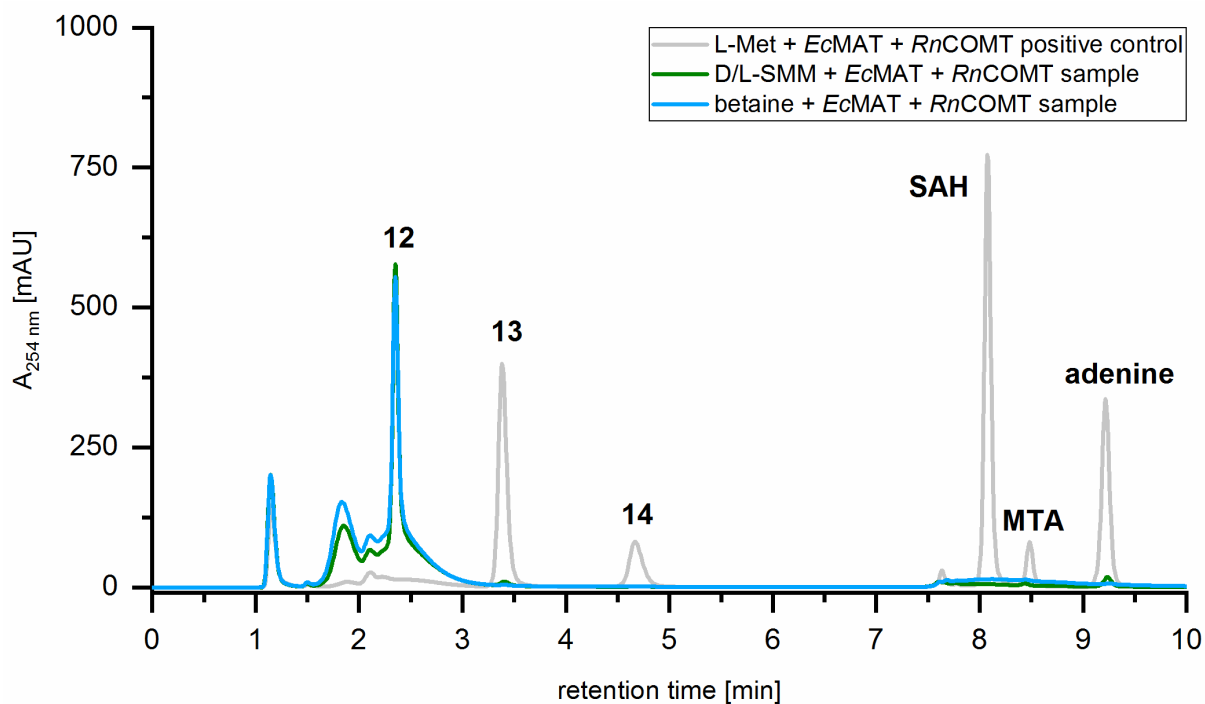

**Fig. S12.** HPLC chromatograms of *EcMAT* and *RnCOMT* incubated with L-methionine or some analogues and ATP. Starting material: 2 mM MT substrate **12**, 3 mM ATP, 3 mM L-methionine, 3 mM D/L-SMM or 3 mM betaine.

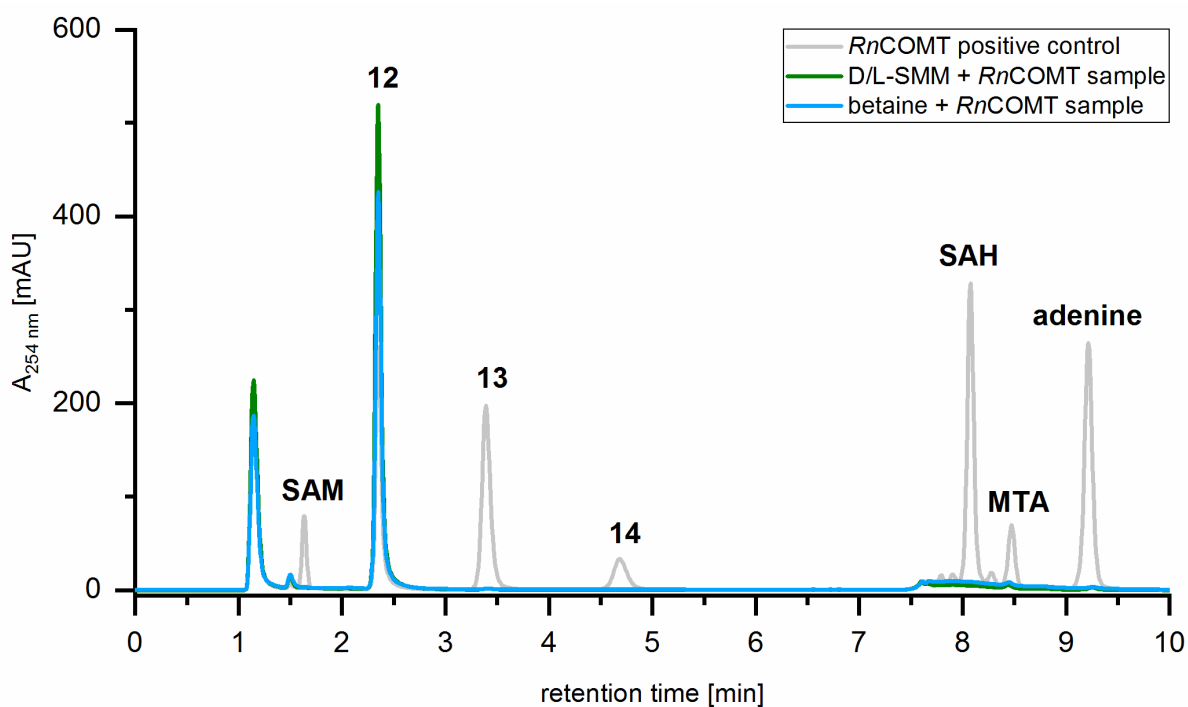

**Fig. S13.** HPLC chromatograms of *RnCOMT* incubated with SAM, D/L-SMM or betaine as possible methyl donors. Starting material: 2 mM MT substrate **12**, 3 mM SAM, 3 mM D/L-SMM or 3 mM betaine. A small peak for **13** is detected in the D/L-SMM sample because of the L-methionine impurity.

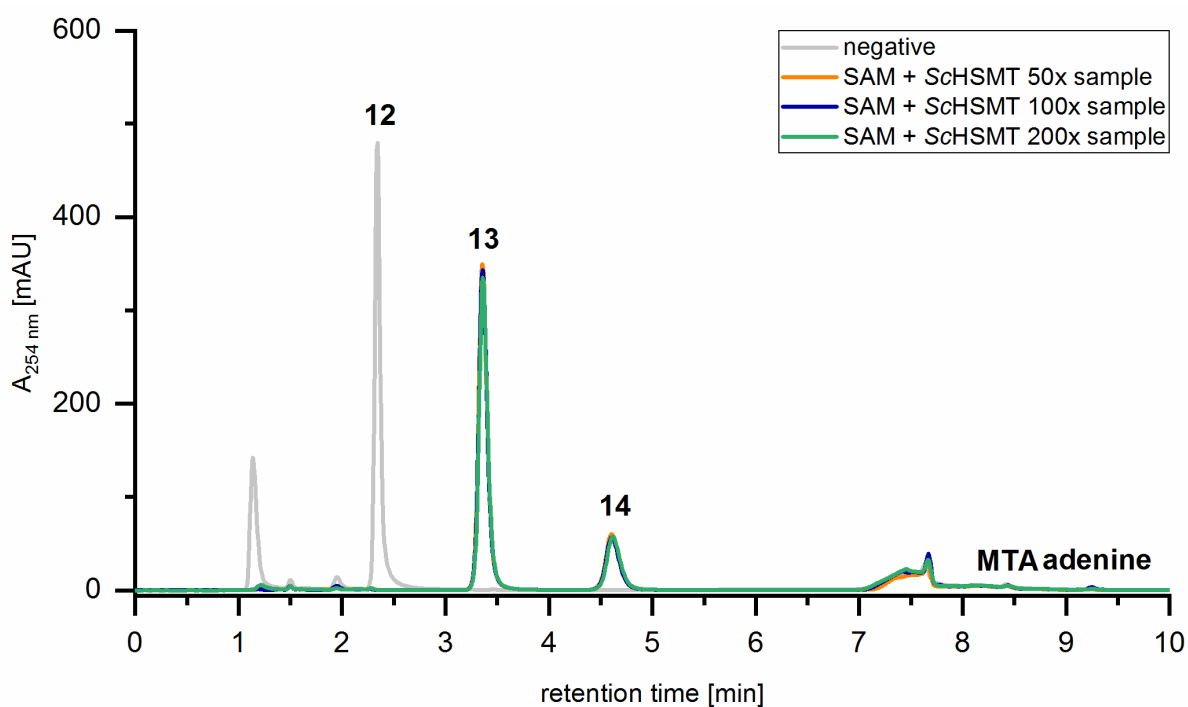

**Fig. S14.** Typical HPLC chromatograms of the SAM regeneration system with *RnCOMT* and additional L-methionine regeneration using ScHSMT. Starting material: 2 mM MT substrate **12**, 3 mM D/L-SMM, 40  $\mu$ M L-methionine, 20 mM polyP (calculated as single phosphate residues), AMP (orange – 40  $\mu$ M, blue – 20  $\mu$ M, green – 10  $\mu$ M).

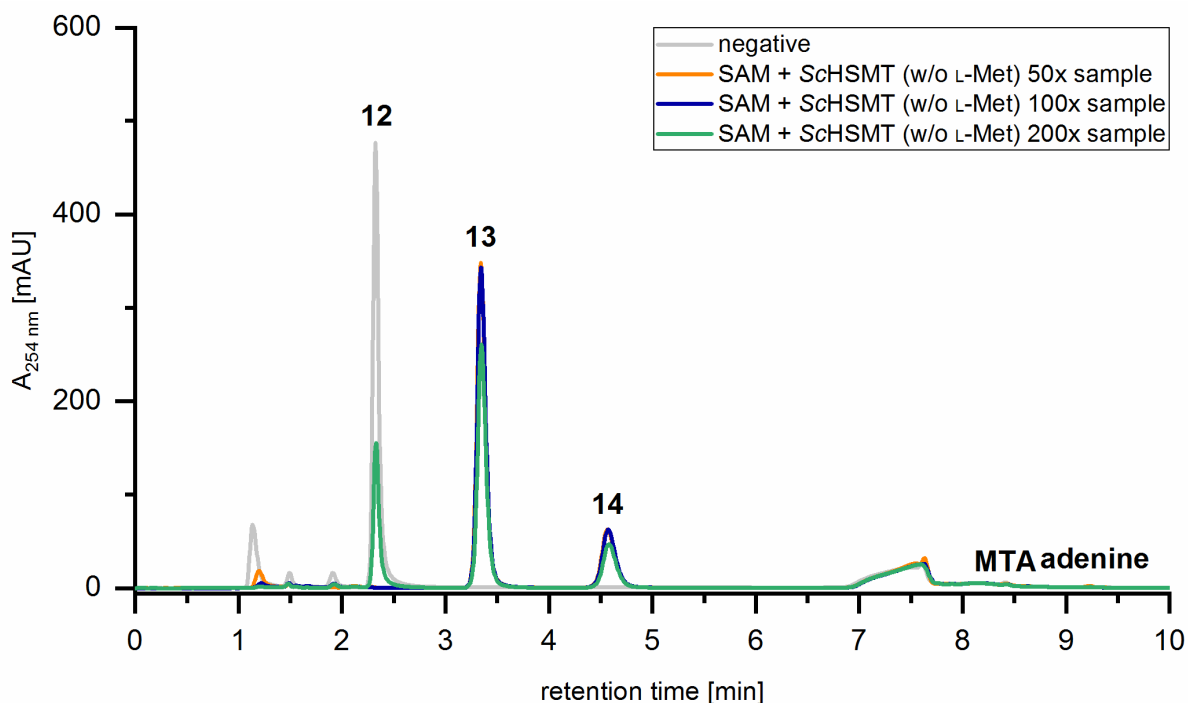

**Fig. S15.** Typical HPLC chromatograms of the SAM regeneration system with *RnCOMT* and additional L-methionine regeneration using ScHSMT. Starting material: 2 mM MT substrate **12**, 3 mM D/L-SMM, 20 mM polyP (calculated as single phosphate residues), AMP (orange – 40  $\mu$ M, blue – 20  $\mu$ M, green – 10  $\mu$ M).

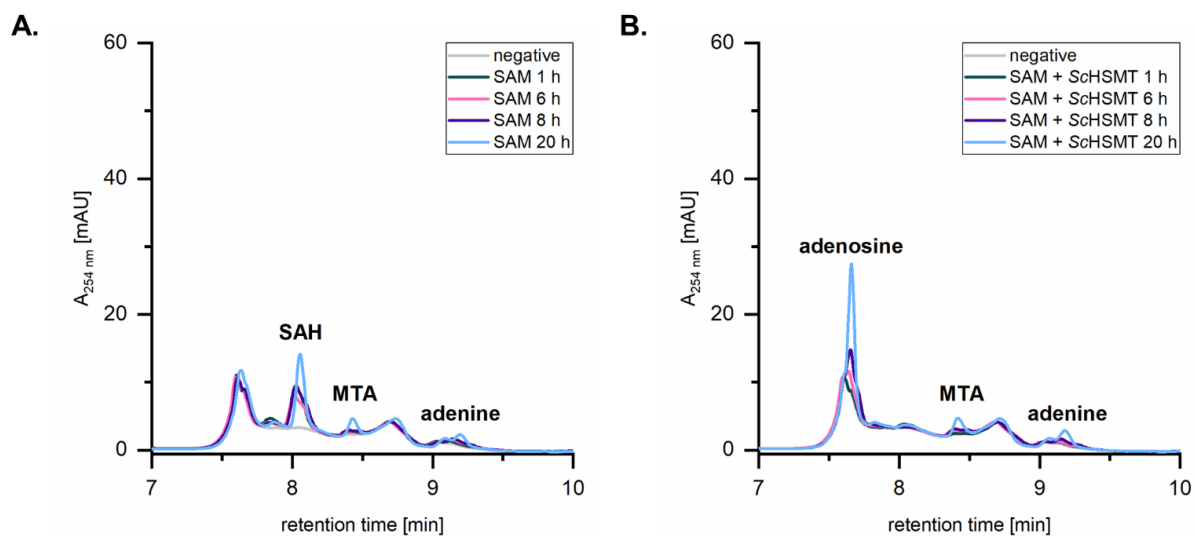

**Fig. S16.** Time course of MT conversion with A. regular SAM regeneration system and B. with the addition of L-methionine regeneration system using ScHSMT with *RnCOMT*. Starting material: 2 mM MT substrate **12**, 3 mM L-methionine (A) or 3 mM D/L-SMM and 40  $\mu$ M L-methionine (addition of ScHSMT, B), 20 mM polyP (calculated as single phosphate residues), 40  $\mu$ M AMP. The same data as in Fig. S21 is shown.

L-Methionine was identified as an impurity in the *S*-methyl-D/L-methionine authentic standard (Fig. S17) when being compared to the L-methionine authentic standard (Fig. S18) using  $^1\text{H}$  NMR spectroscopy. The manufacturer gives the purity of the chemical at >99.0%.

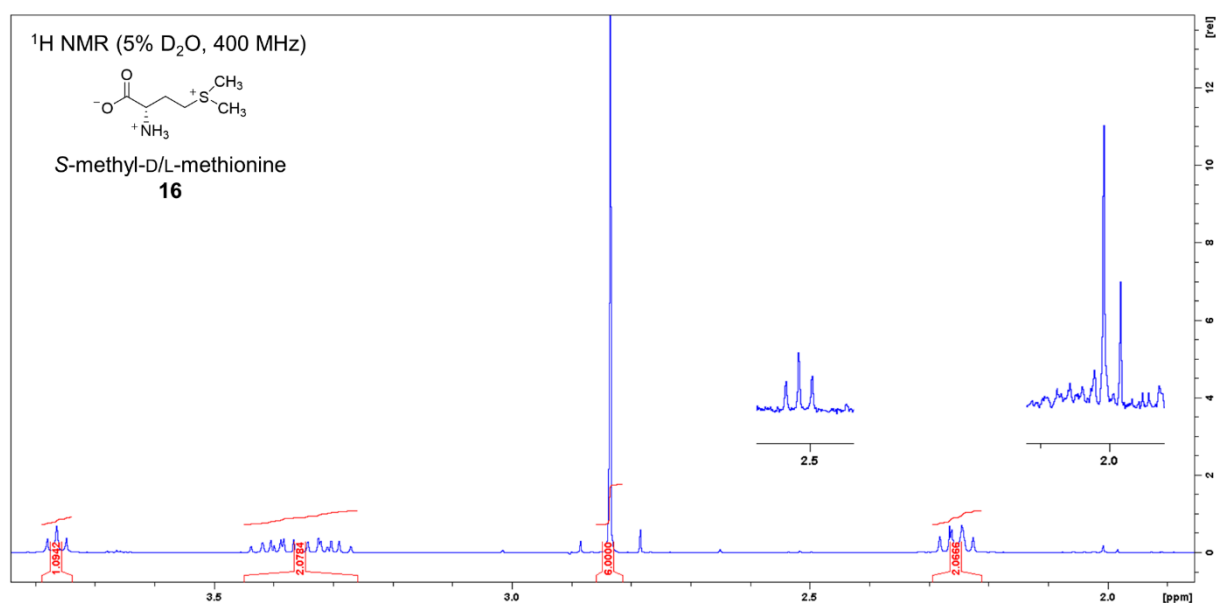

**Fig. S17.**  $^1\text{H}$  NMR spectrum of the authentic reference of *S*-methyl-D/L-methionine (**16**) showing the L-methionine impurity in 5%  $\text{D}_2\text{O}$ .

*S*-Methyl-D/L-methionine (**16**):

$^1\text{H}$  NMR (5%  $\text{D}_2\text{O}$ , 25  $^\circ\text{C}$ , 400 MHz):  $\delta$  = 3.76 ppm (t,  $J$  = 6.8 Hz,  $\text{C}_\alpha\text{-H}$ ), 3.36 ppm (m,  $\text{C}_\gamma\text{-H}_2$ ), 2.84 ppm (s,  $\text{CH}_3\text{-S}$ ), 2.25 ppm (q,  $J$  = 8.3 Hz,  $\text{C}_\beta\text{-H}_2$ ).

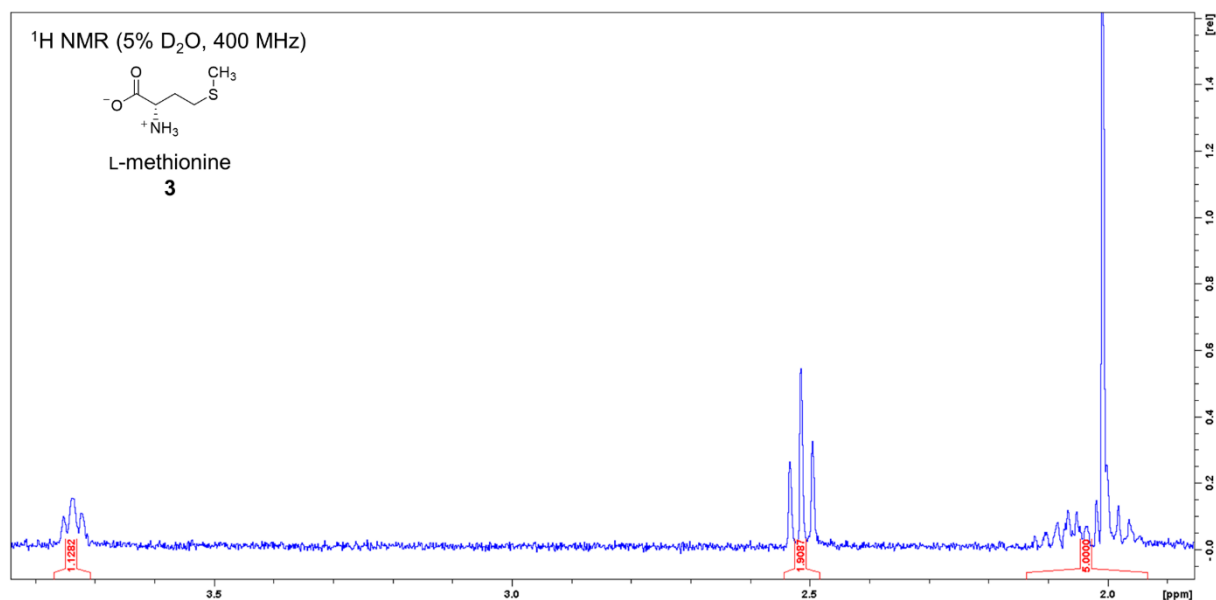

**Fig. S18.**  $^1\text{H}$  NMR spectrum of the authentic reference of L-methionine (**3**) in 5%  $\text{D}_2\text{O}$ .

L-Methionine (**3**):

$^1\text{H}$  NMR (5%  $\text{D}_2\text{O}$ , 25  $^\circ\text{C}$ , 400 MHz):  $\delta$  = 3.74 ppm (t,  $J$  = 8.0 Hz,  $\text{C}_\alpha\text{-H}$ ), 2.51 ppm (t,  $J$  = 8.0 Hz,  $\text{C}_\gamma\text{-H}_2$ ), 2.04 ppm (m,  $\text{CH}_3\text{-S}$ ,  $\text{C}_\beta\text{-H}_2$ ).

## **N-Methylation also improved by optimised system with L-methionine regeneration**

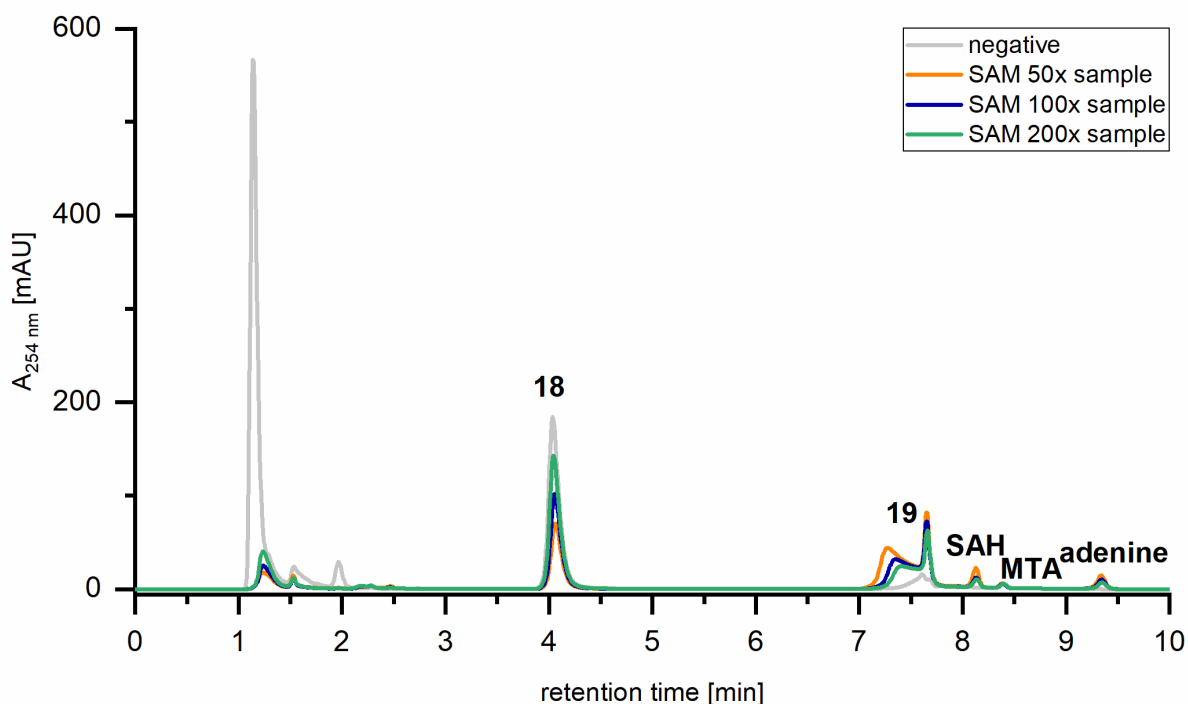

**Fig. S19.** Typical HPLC chromatograms of the SAM regeneration system with *RgANMT*. Starting material: 2 mM MT substrate **18**, 3 mM L-methionine, 20 mM polyP (calculated as single phosphate residues), AMP (orange – 40  $\mu$ M, blue – 20  $\mu$ M, green – 10  $\mu$ M).

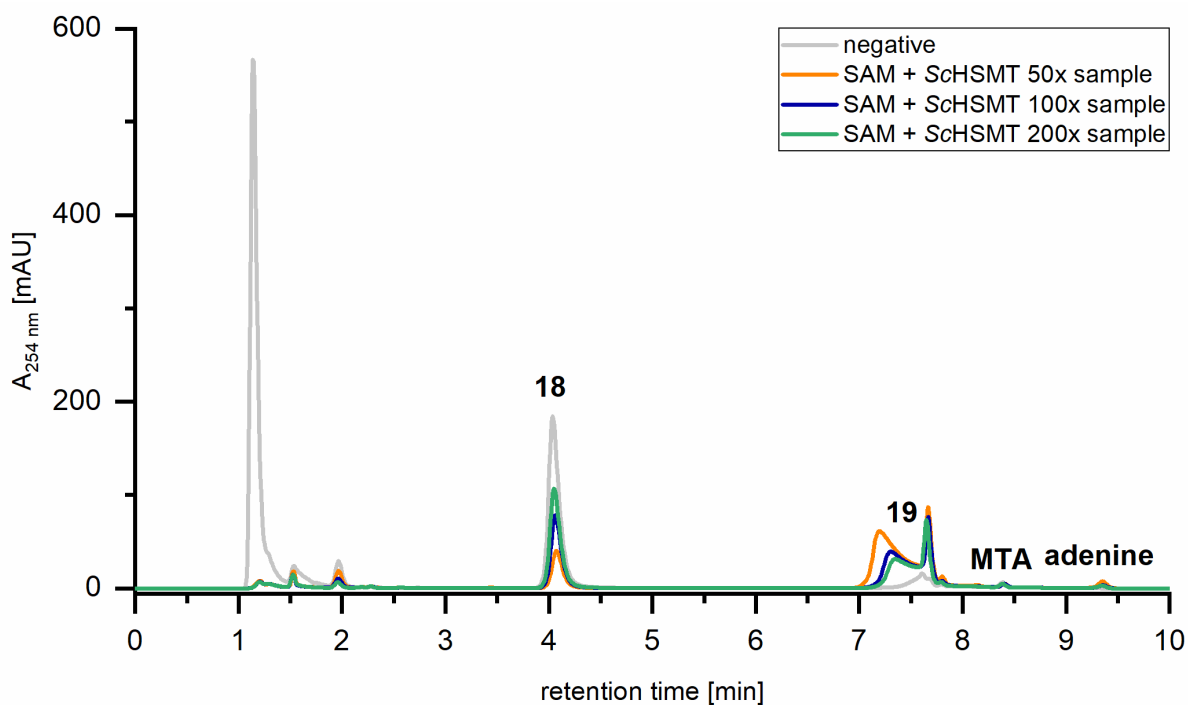

**Fig. S20.** Typical HPLC chromatograms of the SAM regeneration system with *RgANMT* and additional L-methionine regeneration using *ScHSMT*. Starting material: 2 mM MT substrate **18**, 3 mM D/L-SMM, 40  $\mu$ M L-methionine, 20 mM polyP (calculated as single phosphate residues), AMP (orange – 40  $\mu$ M, blue – 20  $\mu$ M, green – 10  $\mu$ M).



## Cyclic SAM regeneration with L-methionine regeneration is more efficient than without

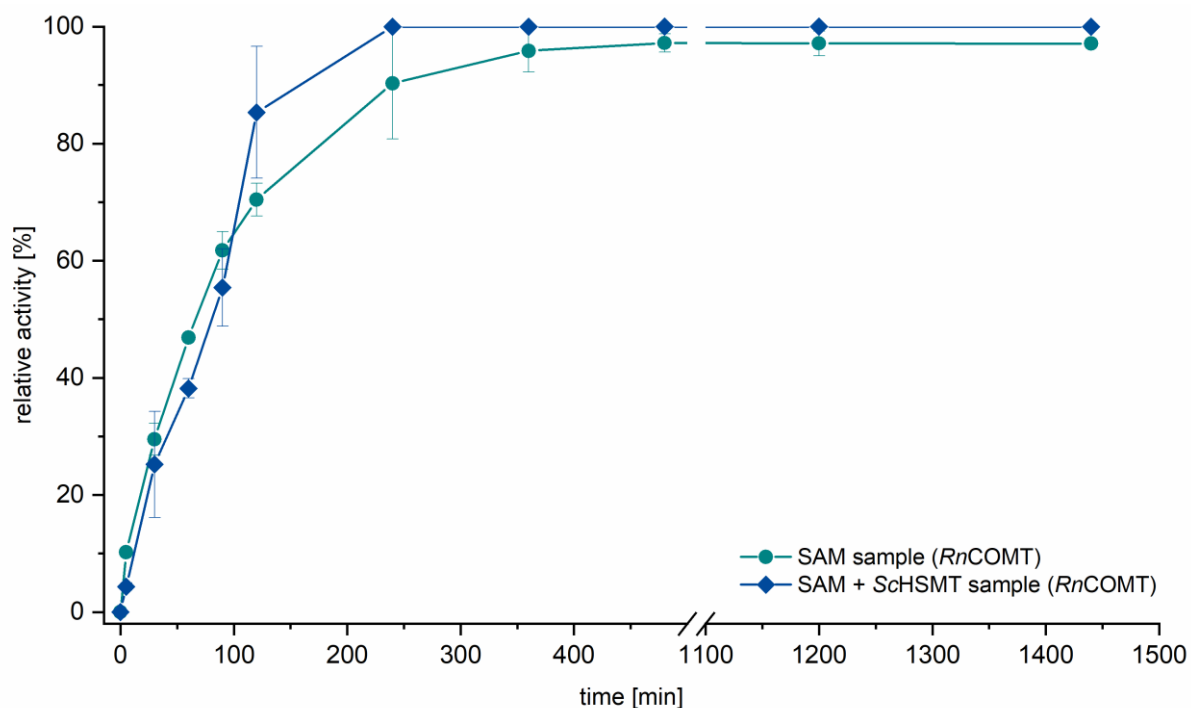

**Fig. S21.** Time course of MT conversion with regular SAM regeneration system (green) and with the addition of L-methionine regeneration system using ScHSMT (blue) with *RnCOMT*. Starting material: 2 mM MT substrate **12**, 3 mM L-methionine (green) or 3 mM D/L-SMM and 40  $\mu$ M L-methionine (addition of ScHSMT, blue), 20 mM polyP (calculated as single phosphate residues), 40  $\mu$ M AMP.

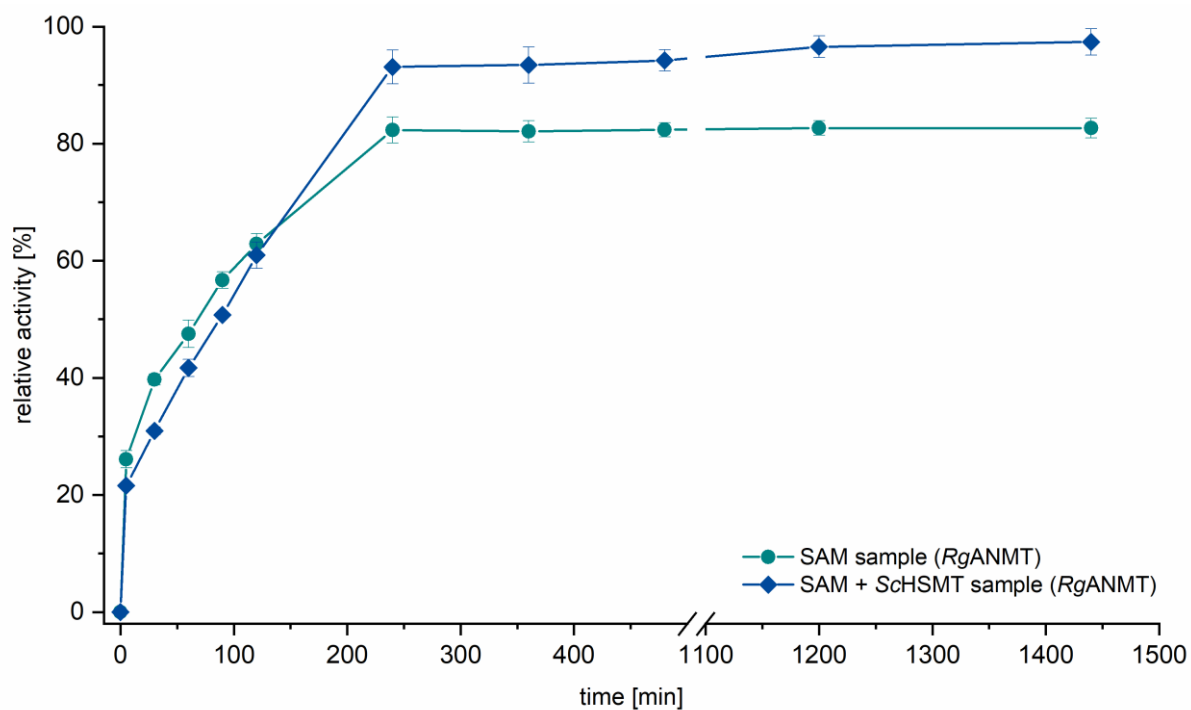

**Fig. S22.** Time course of MT conversion with regular SAM regeneration system (green) and with the addition of L-methionine regeneration system using ScHSMT (blue) with *RgANMT*. Starting material: 2 mM MT substrate **18**, 3 mM L-methionine (green) or 3 mM D/L-SMM and 40  $\mu$ M L-methionine (addition of ScHSMT, blue), 20 mM polyP (calculated as single phosphate residues), 40  $\mu$ M AMP.

## Regeneration of SAM analogues is possible with nucleobase modifications

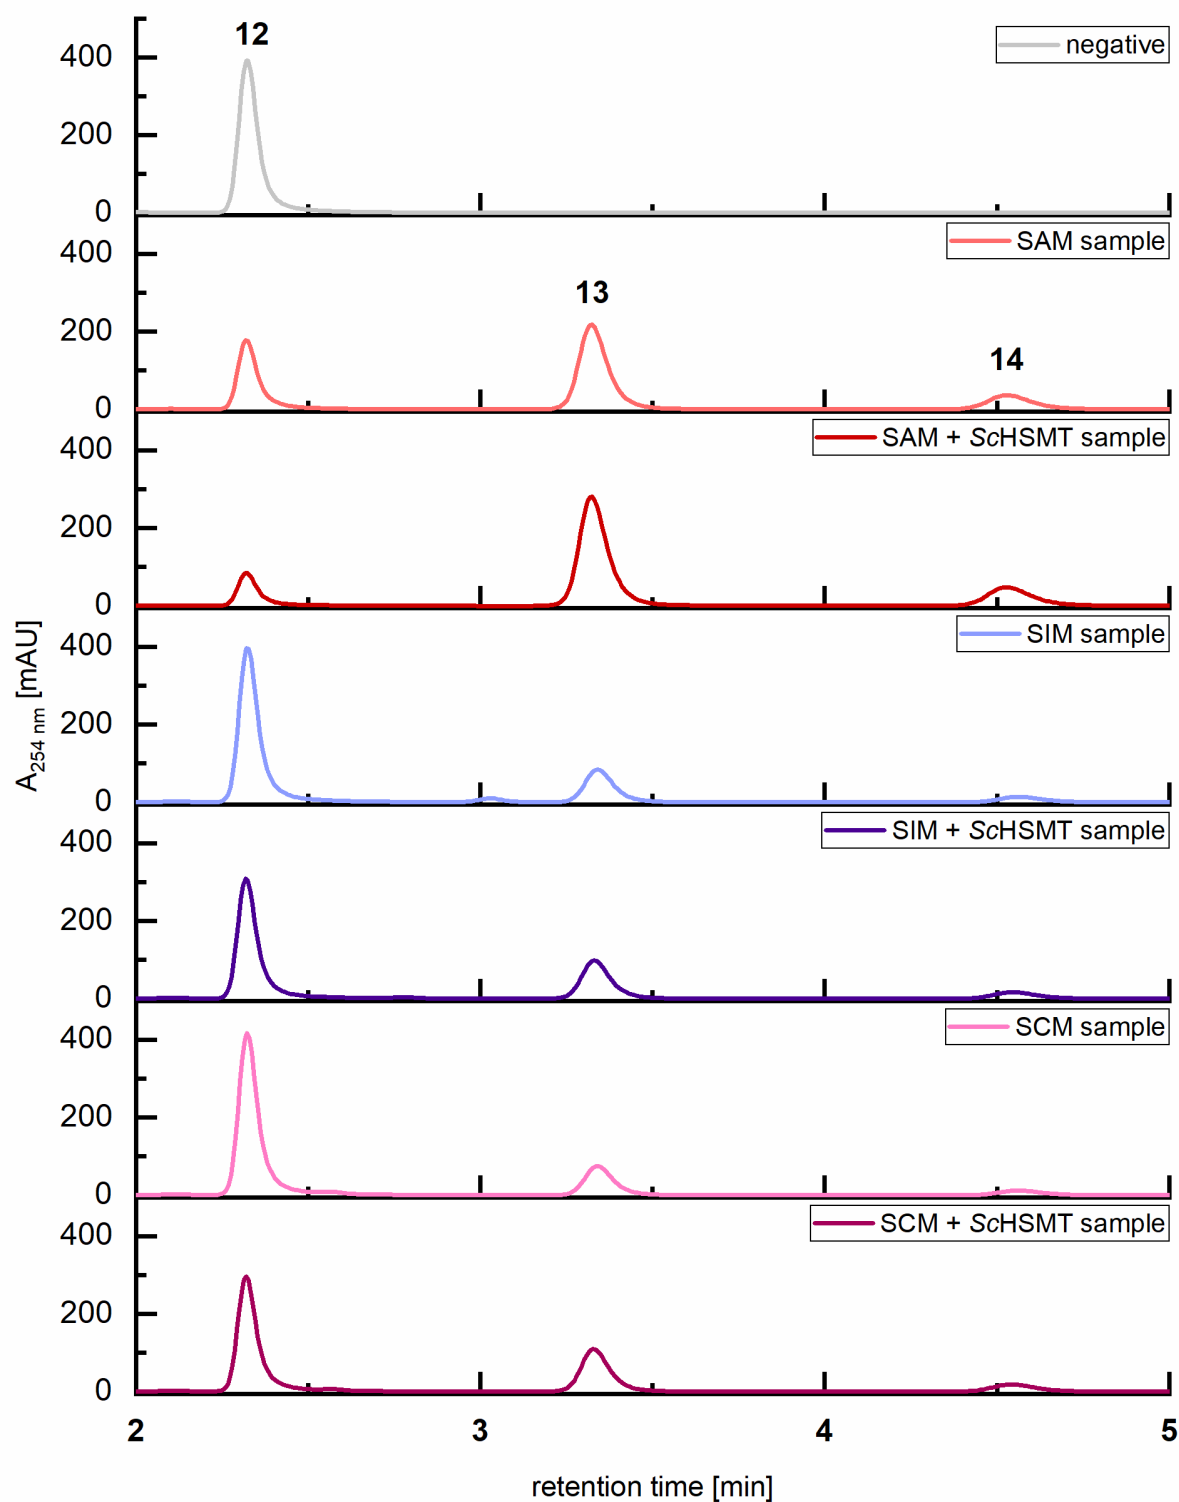

**Fig. S23.** Typical HPLC chromatograms of the SAM (reds), SIM (purples) and SCM (pinks) regeneration systems with *RnCOMT*. Starting material: 2 mM MT substrate **12**, 3 mM L-methionine (regular regeneration system, light colours) or 3 mM D/L-SMM and 40  $\mu$ M L-methionine (addition of ScHSMT, dark colours), 20 mM polyP (calculated as single phosphate residues), 40  $\mu$ M NMP.

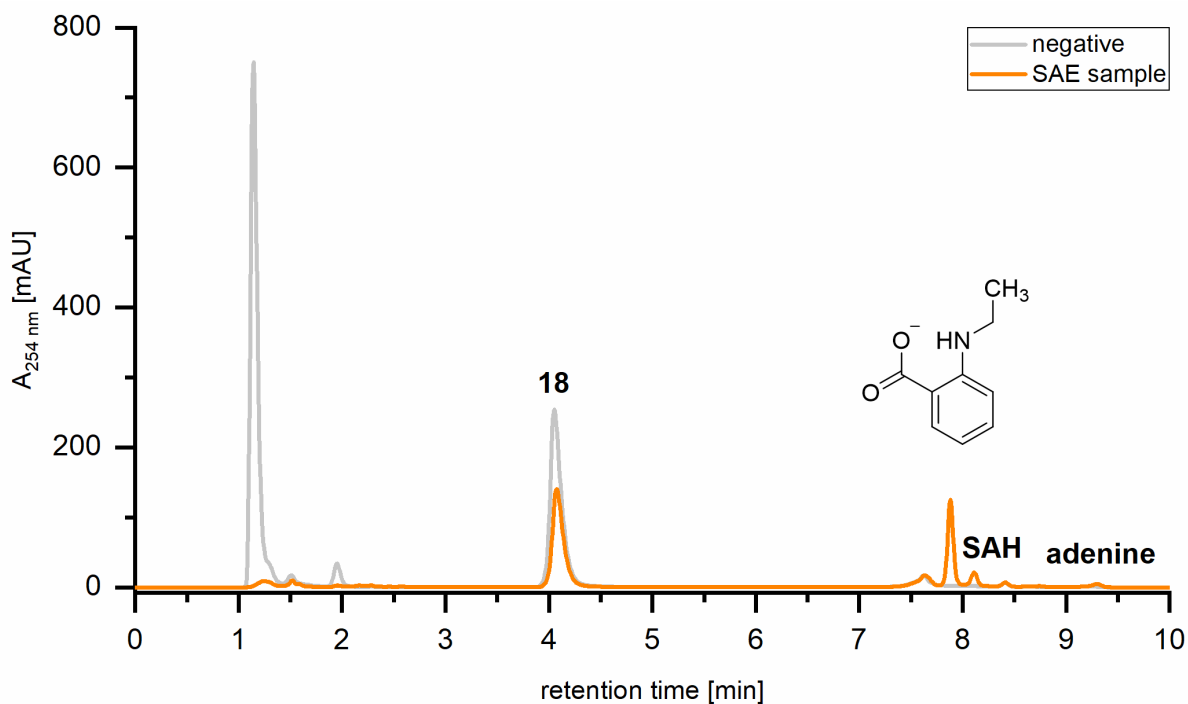

**Fig. S24.** Typical HPLC chromatograms of the SAE regeneration system with *RgANMT*. Starting material: 2 mM MT substrate **18**, 3 mM L-ethionine, 20 mM polyP (calculated as single phosphate residues), 40  $\mu$ M AMP.

### The regeneration system can be used with crude lysates

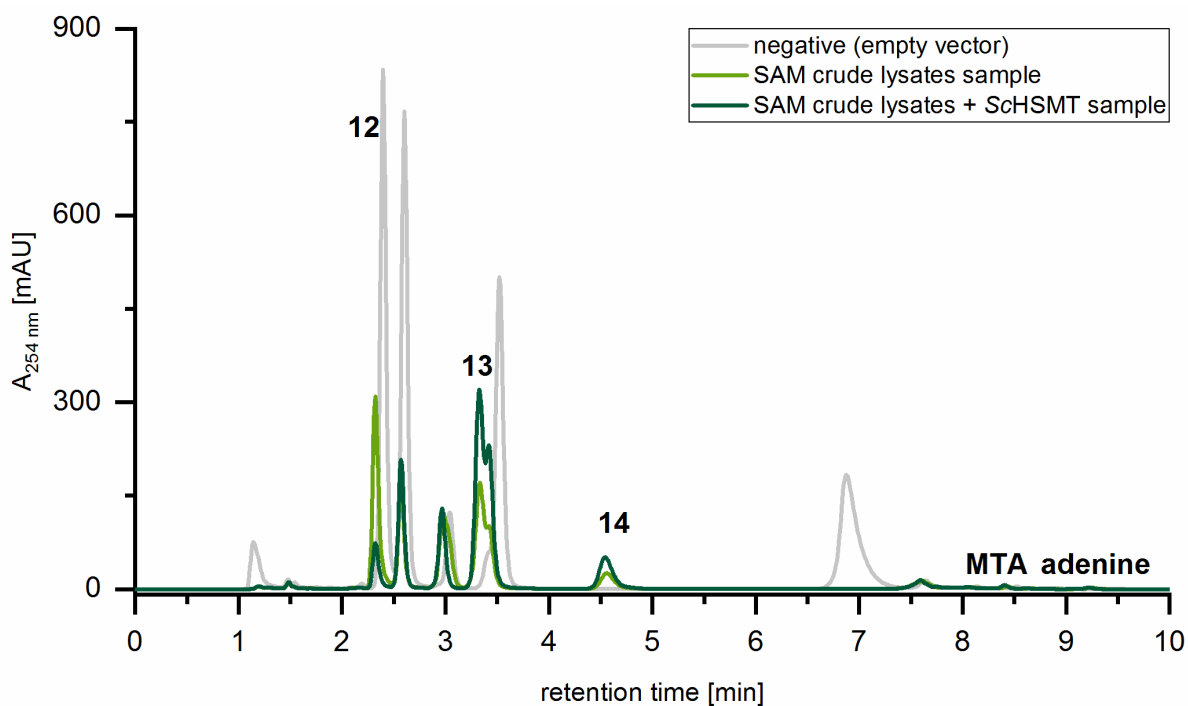

**Fig. S25.** HPLC chromatograms of the SAM regeneration system using crude lysates with *RnCOMT*. Starting material: 2 mM MT substrate **12**, 3 mM L-methionine (regular regeneration system, green) or 3 mM D/L-SMM and 40  $\mu$ M L-methionine (addition of SchSMT, dark green), 20 mM polyP (calculated as single phosphate residues), 40  $\mu$ M AMP.

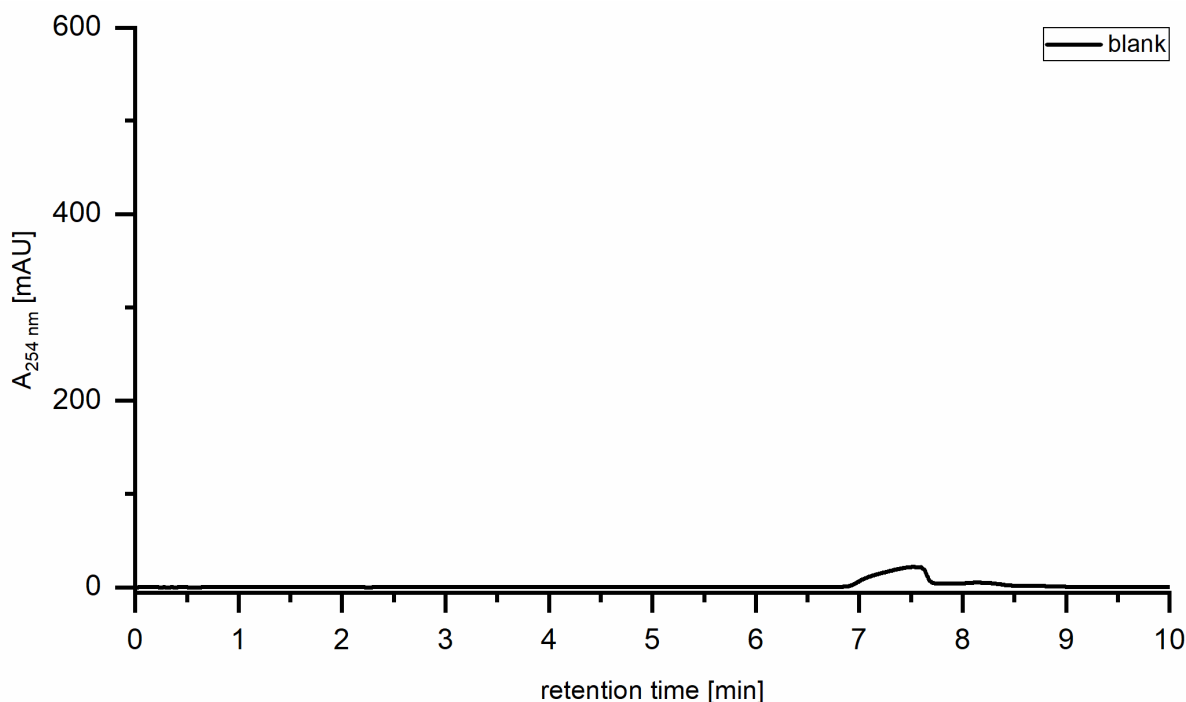

**Fig. S26.** HPLC chromatogram of a blank sample (injection of water). A peak is always visible between 7 and 8 min.

## References

- 1 S. Mordhorst, J. Siegrist, M. Müller, M. Richter and J. N. Andexer, *Angew. Chem. Int. Ed.*, 2017, **56**, 4037–4041.
- 2 J. Siegrist, S. Aschwanden, S. Mordhorst, L. Thöny-Meyer, M. Richter and J. N. Andexer, *ChemBioChem*, 2015, **16**, 2576–2579.
- 3 J. Schlesier, J. Siegrist, S. Gerhardt, A. Erb, S. Blaesli, M. Richter, O. Einsle and J. N. Andexer, *BMC Struct. Biol.*, 2013, **13**, 22.
- 4 C. Liao and F. P. Seebeck, *Nat. Catal.*, 2019, **2**, 696–701.
- 5 E. Gasteiger, C. Hoogland, A. Gattiker, S. Duvaud, M. R. Wilkins, R. D. Appel and A. Bairoch, in *The Proteomics Protocols Handbook*, ed. J. M. Walker, Humana Press, Totowa, NJ, 2005, pp. 571–607.
- 6 U. K. Laemmli, *Nature*, 1970, **227**, 680–685.
- 7 Q. Tang, C. W. Grathwol, A. S. Aslan-Üzel, S. Wu, A. Link, I. V. Pavlidis, C. P. S. Badenhorst and U. T. Bornscheuer, *Angew. Chem. Int. Ed.*, 2021, **60**, 1524–1527.
- 8 N. V. Cornelissen, F. Michailidou, F. Muttach, K. Rau and A. Rentmeister, *Chem. Commun.*, 2020, **56**, 2115–2118.
- 9 Z. J. Lu and G. D. Markham, *J. Biol. Chem.*, 2002, **277**, 16624–16631.
- 10 S. Singh, J. Zhang, T. D. Huber, M. Sunkara, K. Hurley, R. D. Goff, G. Wang, W. Zhang, C. Liu, J. Rohr, S. G. Van Lanen, A. J. Morris and J. S. Thorson, *Angew. Chem. Int. Ed.*, 2014, **53**, 3965–3969.
- 11 T. D. Huber, F. Wang, S. Singh, B. R. Johnson, J. Zhang, M. Sunkara, S. G. Van Lanen, A. J. Morris, G. N. Phillips and J. S. Thorson, *ACS Chem. Biol.*, 2016, **11**, 2484–2491.
- 12 T. D. Huber, J. A. Clinger, Y. Liu, W. Xu, M. D. Miller, G. N. Phillips and J. S. Thorson, *ACS Chem. Biol.*, 2020, **15**, 695–705.
- 13 F. Muttach, F. Mäsing, A. Studer and A. Rentmeister, *Chem. Eur. J.*, 2017, **23**, 5988–5993.
- 14 C. Dalhoff, G. Lukinavičius, S. Klimašauskas and E. Weinhold, *Nat. Chem. Biol.*, 2006, **2**, 31–32.
- 15 I. J. W. McKean, J. C. Sadler, A. Cuetos, A. Frese, L. D. Humphreys, G. Grogan, P. A. Hoskisson and G. A. Burley, *Angew. Chem. Int. Ed.*, 2019, **58**, 17583–17588.
- 16 B. J. C. Law, A.-W. Struck, M. R. Bennett, B. Wilkinson and J. Micklefield, *Chem. Sci.*, 2015, **6**, 2885–2892.
- 17 S. Shimizu, S. Shiozaki, T. Ohshiro and H. Yamada, *Eur. J. Biochem.*, 1984, **141**, 385–392.
- 18 D. Miller, H. Xu and R. H. White, *J. Bacteriol.*, 2015, **197**, 2284–2291.

- 19 M. C. Long, S. C. Shaddix, O. Moukha-Chafiq, J. A. Maddry, L. Nagy and W. B. Parker, *Biochem. Pharmacol.*, 2008, **75**, 1588–1600.
- 20 X.-B. Lv, H.-Z. Wu, J. Ye, Y. Fan and H.-Z. Zhang, *Acta Biochim. Biophys. Sin.*, 2003, **35**, 666–670.
- 21 M. Vodnala, A. Fijolek, R. Rofougaran, M. Mosimann, P. Mäser and A. Hofer, *J. Biol. Chem.*, 2008, **283**, 5380–5388.
- 22 L. E. Batten, A. E. Parnell, N. J. Wells, A. L. Murch, P. C. F. Oyston and P. L. Roach, *Biosci. Rep.*, 2016, **36**, e00294.
- 23 B. P. Nocek, A. N. Khusnutdinova, M. Ruszkowski, R. Flick, M. Burda, K. Batyrova, G. Brown, A. Mucha, A. Joachimiak, Ł. Berlicki and A. F. Yakunin, *ACS Catal.*, 2018, **8**, 10746–10760.
- 24 J. Nahalka and V. Patoprsty, *Org. Biomol. Chem.*, 2009, **7**, 1778–1780.
- 25 B. Nocek, S. Kochinyan, M. Proudfoot, G. Brown, E. Evdokimova, J. Osipiuk, A. M. Edwards, A. Savchenko, A. Joachimiak and A. F. Yakunin, *Proc. Natl. Acad. Sci. U. S. A.*, 2008, **105**, 17730–17735.
